# Supplementary material for: HETerogeneous vectorized or Parallel (HETPv1.0): an updated inorganic heterogeneous chemistry solver for the metastable-state NH 4 + –Na + –Ca 2+ –K + –Mg 2+ –SO 4 2− –NO 3 − –Cl − –H 2 O system based on ISORROPIA II
Source: Copernicus journal article supplement (doi:10.5194/gmd-17-2197-2024), 2024-03-19
Supplement: Supplementary file 1 [file gmd-17-2197-2024-supplement.pdf]

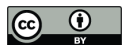

*Supplement of*

**HETerogeneous vectorized or Parallel (HETPv1.0): an updated inorganic heterogeneous chemistry solver for the metastable-state  $\text{NH}_4^+$ – $\text{Na}^+$ – $\text{Ca}^{2+}$ – $\text{K}^+$ – $\text{Mg}^{2+}$ – $\text{SO}_4^{2-}$ – $\text{NO}_3^-$ – $\text{Cl}^-$ – $\text{H}_2\text{O}$  system based on ISORROPIA II**

Stefan J. Miller et al.

Correspondence to: Stefan J. Miller ([stefan.miller@ec.gc.ca](mailto:stefan.miller@ec.gc.ca)) and Paul A. Makar ([paul.makar@ec.gc.ca](mailto:paul.makar@ec.gc.ca))

The copyright of individual parts of the supplement might differ from the article licence.

## Supplemental Information

**Table S1:** Equilibrium reactions (ER) considered in metastable state chemical subspaces. ER8 to ER25 form the basis for dry salt partitioning during the initialization of some chemical subspaces (see Table S2).

|             |                                                                                                                                     |
|-------------|-------------------------------------------------------------------------------------------------------------------------------------|
| <b>ER8</b>  | $\text{Na}_2\text{SO}_{4(s)} \rightleftharpoons 2\text{Na}_{(aq)}^+ + \text{SO}_{4(aq)}^{2-}$                                       |
| <b>ER9</b>  | $\text{NH}_4\text{HSO}_{4(s)} \rightleftharpoons \text{NH}_{4(aq)}^+ + \text{HSO}_{4(aq)}^-$                                        |
| <b>ER10</b> | $\text{NaHSO}_{4(s)} \rightleftharpoons \text{Na}_{(aq)}^+ + \text{HSO}_{4(aq)}^-$                                                  |
| <b>ER11</b> | $(\text{NH}_4)_3\text{H}(\text{SO}_4)_2(s) \rightleftharpoons 3\text{NH}_{4(aq)}^+ + \text{HSO}_{4(aq)}^- + \text{SO}_{4(aq)}^{2-}$ |
| <b>ER12</b> | $(\text{NH}_4)_2\text{SO}_{4(s)} \rightleftharpoons 2\text{NH}_{4(aq)}^+ + \text{SO}_{4(aq)}^{2-}$                                  |
| <b>ER13</b> | $\text{CaSO}_4 \cdot 2\text{H}_2\text{O} \rightleftharpoons \text{Ca}_{(aq)}^{2+} + \text{SO}_{4(aq)}^{2-} + 2\text{H}_2\text{O}$   |
| <b>ER14</b> | $\text{K}_2\text{SO}_{4(s)} \rightleftharpoons 2\text{K}_{(aq)}^+ + \text{SO}_{4(aq)}^{2-}$                                         |
| <b>ER15</b> | $\text{MgSO}_{4(s)} \rightleftharpoons \text{Mg}_{(aq)}^{2+} + \text{SO}_{4(aq)}^{2-}$                                              |
| <b>ER16</b> | $\text{NH}_4\text{Cl}_{(s)} \rightleftharpoons \text{NH}_{3(g)} + \text{HCl}_{(g)}$                                                 |
| <b>ER17</b> | $\text{NaNO}_3(s) \rightleftharpoons \text{Na}_{(aq)}^+ + \text{NO}_3^-(aq)$                                                        |
| <b>ER18</b> | $\text{NaCl}_{(s)} \rightleftharpoons \text{Na}_{(aq)}^+ + \text{Cl}_{(aq)}^-$                                                      |
| <b>ER19</b> | $\text{Ca}(\text{NO}_3)_2(s) \rightleftharpoons \text{Ca}_{(aq)}^{2+} + 2\text{NO}_3^-(aq)$                                         |
| <b>ER20</b> | $\text{CaCl}_2(s) \rightleftharpoons \text{Ca}_{(aq)}^{2+} + 2\text{Cl}_{(aq)}^-$                                                   |
| <b>ER21</b> | $\text{Mg}(\text{NO}_3)_2(s) \rightleftharpoons \text{Mg}_{(aq)}^{2+} + 2\text{NO}_3^-(aq)$                                         |
| <b>ER22</b> | $\text{MgCl}_2(s) \rightleftharpoons \text{Mg}_{(aq)}^{2+} + 2\text{Cl}_{(aq)}^-$                                                   |
| <b>ER23</b> | $\text{KCl}_{(s)} \rightleftharpoons \text{K}_{(aq)}^+ + \text{Cl}_{(aq)}^-$                                                        |
| <b>ER24</b> | $\text{KNO}_3(s) \rightleftharpoons \text{K}_{(aq)}^+ + \text{NO}_3^-(aq)$                                                          |
| <b>ER25</b> | $\text{KHSO}_4(s) \rightleftharpoons \text{K}_{(aq)}^+ + \text{HSO}_4^-(aq)$                                                        |

5

10

15

20

**Table S2.** System of equations to be solved for each chemical subspace for metastable state, based on the algorithms of ISORROPIA. Note that the conditions under which a given system is solved appears in Figure 1. Activity coefficients are not included in the equations, which are assumed to be equal to unity for simplicity. Conversion factors (i.e.,  $RT$ , aerosol liquid water content) are included in variables representing the equilibrium constants.

| Case      | Solution: major system (solved first)                                                                                                                                                                                                                                                                                                                                                                                                                                                                                                                                                                                                                                                                                                                                                                                                                                                                                                                                                                                                                                                                                                                                                                                                                                                                                                                                                                                                                                                                                                                                                                                                                                                                                                                                                                                                                               | Solution: minor systems (solved second, after convergence of major system)                                                                                                                          |
|-----------|---------------------------------------------------------------------------------------------------------------------------------------------------------------------------------------------------------------------------------------------------------------------------------------------------------------------------------------------------------------------------------------------------------------------------------------------------------------------------------------------------------------------------------------------------------------------------------------------------------------------------------------------------------------------------------------------------------------------------------------------------------------------------------------------------------------------------------------------------------------------------------------------------------------------------------------------------------------------------------------------------------------------------------------------------------------------------------------------------------------------------------------------------------------------------------------------------------------------------------------------------------------------------------------------------------------------------------------------------------------------------------------------------------------------------------------------------------------------------------------------------------------------------------------------------------------------------------------------------------------------------------------------------------------------------------------------------------------------------------------------------------------------------------------------------------------------------------------------------------------------|-----------------------------------------------------------------------------------------------------------------------------------------------------------------------------------------------------|
| <b>A2</b> | <p><u>The set of initial equations are:</u></p> <p>(1) ER1 to ER4</p> <p>(2) Mass balance for TS and TA</p> $TS = [\text{SO}_4^{2-}] + [\text{HSO}_4^-]$ $TA = [\text{NH}_4^+] + [\text{NH}_3]$ <p>(3) Electroneutrality</p> $[\text{NH}_4^+] + [\text{H}^+] = 2[\text{SO}_4^{2-}] + [\text{HSO}_4^-]$ <p><u>Solution:</u></p> <p>The initial step is to perform a root bracketing search for <math>[\text{H}^+]</math> within the range <math>[\text{tiny}, 2\text{TS}]</math> to identify an interval where the ‘objective function’ contains a sign change (i.e., root), followed by an ITP search to refine <math>[\text{H}^+]</math> within the identified interval, if applicable.</p> <p><u>System of equations:</u></p> <p>Combining (1) and (2) gives a system of equations:</p> <p><math>[\text{H}^+] =</math> determined from ITP</p> $[\text{HSO}_4^-] = \frac{TS}{1 + \frac{K_{\text{HSO}_4}}{[\text{H}^+]}}$ $[\text{SO}_4^{2-}] = TS - \frac{TS}{1 + \frac{K_{\text{HSO}_4}}{[\text{H}^+]}}$ $[\text{NH}_4^+] = \frac{TA}{1 + \left( \frac{1}{[\text{H}^+] \frac{K_{\text{NH}_3}}{K_{\text{H}_2\text{O}}}} \right)}$ $[\text{NH}_3] = TA - [\text{NH}_4^+]$ <p>Rearranging (3) gives the ‘objective function’. The objective function is evaluated using the ion concentrations determined above, and its sign (i.e., positive or negative) is then used to initialize the next iteration of the ITP procedure.</p> $\frac{[\text{NH}_4^+]}{2[\text{SO}_4^{2-}] + [\text{HSO}_4^-]} + \frac{[\text{H}^+]}{2[\text{SO}_4^{2-}] + [\text{HSO}_4^-]} - 1 = 0$ <p><u>For all subroutines requiring ITP:</u> The solution is solved iteratively, until the change in the bisected variable between successive iterations is less than <math>\epsilon</math> (determined from a chosen tolerance) or exceeds the maximum number of allowed iterations.</p> | Not applicable                                                                                                                                                                                      |
| <b>B4</b> | <p><u>The set of initial equations are:</u></p> <p>(1) ER1</p> <p>(2) Mass balance for TS and TA</p> $TS = [\text{SO}_4^{2-}] + [\text{HSO}_4^-]$                                                                                                                                                                                                                                                                                                                                                                                                                                                                                                                                                                                                                                                                                                                                                                                                                                                                                                                                                                                                                                                                                                                                                                                                                                                                                                                                                                                                                                                                                                                                                                                                                                                                                                                   | <p><u>The set of initial equations are:</u></p> <p>(1) ER2-ER4</p> <p>(2) <math>[\text{H}^+]_i = [\text{H}^+]</math> and <math>[\text{NH}_4^+]_i = [\text{NH}_4^+]</math> from the major system</p> |

|           |                                                                                                                                                                                                                                                                                                                                                                                                                                                                                                                                                                                                                                                                                                                                                                                                                                                                                                                                                                                                                                                                                                                                                                                                                                                                                                                                                                                                                                                             |                                                                                                                                                                                                                                                                                                                                                                                                                                                                                                                                                                                                                 |
|-----------|-------------------------------------------------------------------------------------------------------------------------------------------------------------------------------------------------------------------------------------------------------------------------------------------------------------------------------------------------------------------------------------------------------------------------------------------------------------------------------------------------------------------------------------------------------------------------------------------------------------------------------------------------------------------------------------------------------------------------------------------------------------------------------------------------------------------------------------------------------------------------------------------------------------------------------------------------------------------------------------------------------------------------------------------------------------------------------------------------------------------------------------------------------------------------------------------------------------------------------------------------------------------------------------------------------------------------------------------------------------------------------------------------------------------------------------------------------------|-----------------------------------------------------------------------------------------------------------------------------------------------------------------------------------------------------------------------------------------------------------------------------------------------------------------------------------------------------------------------------------------------------------------------------------------------------------------------------------------------------------------------------------------------------------------------------------------------------------------|
|           | <p>TA = <math>[\text{NH}_4^+]</math></p> <p>(3) Electroneutrality<br/> <math>[\text{NH}_4^+] + [\text{H}^+] = 2[\text{SO}_4^{2-}] + [\text{HSO}_4^-]</math></p> <p><u>Solution:</u><br/> Combining (1), (2) and (3) gives a quadratic equation in terms of <math>[\text{SO}_4^{2-}]</math>.<br/> Let <math>b = K_{\text{HSO}_4} + \text{TS} - \text{TA}</math> and <math>c = -\text{TS}K_{\text{HSO}_4}</math></p> <p>The solution is the <i>positive</i> root of the quadratic formula:<br/> <math display="block">[\text{SO}_4^{2-}] = \frac{-b + \sqrt{b^2 - 4c}}{2}</math> <math display="block">[\text{HSO}_4^-] = \text{TS} - [\text{SO}_4^{2-}]</math> <math display="block">[\text{H}^+] = K_{\text{HSO}_4} \frac{[\text{HSO}_4^-]}{[\text{SO}_4^{2-}]}</math></p>                                                                                                                                                                                                                                                                                                                                                                                                                                                                                                                                                                                                                                                                                  | <p>(3) Let<br/> <math>[\text{NH}_3] = \Delta c</math><br/> <math>[\text{H}^+] = [\text{H}^+]_i + \Delta c</math><br/> <math>[\text{NH}_4^+] = [\text{NH}_4^+]_i - \Delta c</math></p> <p><u>Solution:</u><br/> Substitution of (3) into (1) gives a quadratic equation in terms of <math>\Delta c</math>:<br/> Let <math>b = [\text{H}^+]_i + \frac{1}{K_{\text{H}_2\text{O}}}</math> and <math>c = -\frac{[\text{NH}_4^+]_i}{K_{\text{NH}_3}}</math></p> <p>The solution is the <i>positive</i> root of the quadratic formula:<br/> <math display="block">\Delta c = \frac{-b + \sqrt{b^2 - 4c}}{2}</math></p> |
| <b>C2</b> | <p>Initially it is assumed:<br/> <math>[\text{NH}_4\text{HSO}_4] = \text{TA}</math><br/> <math>[\text{SO}_4]_{\text{free}} = \text{TS} - \text{TA}</math></p> <p><u>The set of initial equations are:</u></p> <p>(1) ER1<br/> (2) Mass balance for TS and TA<br/> <math>\text{TS} = [\text{SO}_4^{2-}] + [\text{HSO}_4^-] = [\text{NH}_4\text{HSO}_4] + [\text{SO}_4]_{\text{free}}</math><br/> <math>\text{TA} = [\text{NH}_4^+] = [\text{NH}_4\text{HSO}_4]</math><br/> (3) Electroneutrality<br/> <math>[\text{NH}_4^+] + [\text{H}^+] = 2[\text{SO}_4^{2-}] + [\text{HSO}_4^-]</math></p> <p><u>Solution:</u><br/> Combining (1), (2) and (3) gives a quadratic equation in terms of <math>[\text{SO}_4^{2-}]</math>.<br/> Let <math>b = K_{\text{HSO}_4} + [\text{SO}_4]_{\text{free}} = K_{\text{HSO}_4} + \text{TS} - \text{TA}</math><br/> and <math>c = -([\text{NH}_4\text{HSO}_4] + [\text{SO}_4]_{\text{free}})K_{\text{HSO}_4} = -\text{TS}K_{\text{HSO}_4}</math></p> <p>The solution is the <i>positive</i> root of the quadratic formula:<br/> <math display="block">[\text{SO}_4^{2-}] = \frac{-b + \sqrt{b^2 - 4c}}{2}</math> <math display="block">[\text{HSO}_4^-] = [\text{NH}_4\text{HSO}_4] + [\text{SO}_4]_{\text{free}} - [\text{SO}_4^{2-}] = \text{TS} - [\text{SO}_4^{2-}]</math> <math display="block">[\text{H}^+] = [\text{SO}_4]_{\text{free}} + [\text{SO}_4^{2-}] = \text{TS} - \text{TA} + [\text{SO}_4^{2-}]</math></p> | <p>The minor system is the same as B4.</p>                                                                                                                                                                                                                                                                                                                                                                                                                                                                                                                                                                      |
| <b>D3</b> | <p>This case begins with dry salt partitioning to determine <math>\Delta c</math>, the amount of <math>\text{NH}_4\text{NO}_3_{(\text{s})}</math> that will volatilize (from ER7). Initially, all TS is assumed to be present as <math>(\text{NH}_4)_2\text{SO}_4_{(\text{s})}</math>.</p> $[\text{NH}_4\text{NO}_3]_i = \min(\text{TA} - 2[(\text{NH}_4)_2\text{SO}_4], \text{TN})$ $[\text{NH}_3]_{\text{dry}_i} = \text{TA} - [\text{NH}_4\text{NO}_3]_i - 2[(\text{NH}_4)_2\text{SO}_4]$ $[\text{HNO}_3]_{\text{dry}_i} = \text{TN} - [\text{NH}_4\text{NO}_3]_i$ <p>Let</p>                                                                                                                                                                                                                                                                                                                                                                                                                                                                                                                                                                                                                                                                                                                                                                                                                                                                            | <p><u>The set of initial equations are:</u></p> <p>(1) ER1<br/> (2) <math>[\text{H}^+]_i = [\text{H}^+]</math> and <math>[\text{SO}_4^{2-}]_i = [\text{SO}_4^{2-}]</math> from the major system.<br/> (3) Let<br/> <math>[\text{SO}_4^{2-}] = [\text{SO}_4^{2-}]_i - \Delta c</math><br/> <math>[\text{H}^+] = [\text{H}^+]_i - \Delta c</math></p>                                                                                                                                                                                                                                                             |

$$[\text{NH}_3]_{dry} = [\text{NH}_3]_{dry_i} + \Delta c$$

$$[\text{HNO}_3]_{dry} = [\text{HNO}_3]_{dry_i} + \Delta c$$

$$[\text{NH}_4\text{NO}_3] = [\text{NH}_4\text{NO}_3]_i - \Delta c$$

and  $b = [\text{NH}_3]_{dry_i} + [\text{HNO}_3]_{dry_i}$  and  $c = -K_{\text{NH}_4\text{NO}_3}$

The 'dry' solution is the *positive* root of the quadratic formula:

$$\Delta c = \frac{-b + \sqrt{b^2 - 4c}}{2}$$

All solids are assumed to undergo deliquescence. The set of initial equations are:

(1) ER2-ER5

(2) Mass balance for TS, TA and TN:

$$\text{TS} = [\text{SO}_4^{2-}] = [(\text{NH}_4)_2\text{SO}_4]$$

$$\text{TA} = [\text{NH}_4^+] + [\text{NH}_3] = 2[(\text{NH}_4)_2\text{SO}_4] + [\text{NH}_4\text{NO}_3] + [\text{NH}_3]_{dry}$$

$$\text{TN} = [\text{NO}_3^-] + [\text{HNO}_3] = [\text{NH}_4\text{NO}_3] + [\text{HNO}_3]_{dry}$$

(3) Electroneutrality

$$[\text{NH}_4^+] + [\text{H}^+] = 2[\text{SO}_4^{2-}] + [\text{HSO}_4^-] + [\text{NO}_3^-] + [\text{OH}^-]$$

Solution:

The initial step is to perform a root bracketing search the variable  $x$  (representing a change in  $[\text{NH}_3]_{dry}$ ) within the range  $[tiny, [\text{NH}_3]_{dry}]$  to identify an interval where the 'objective function' contains a sign change (i.e., root), followed by an ITP search to refine  $x$  within the identified interval, if applicable.

System of equations:

The concentration of  $[\text{SO}_4^{2-}]$  is constant during the iterative procedure of the major system:

$$[\text{SO}_4^{2-}] = [(\text{NH}_4)_2\text{SO}_4]$$

$$[\text{HSO}_4^-] = 0$$

Let:

$$[\text{HNO}_3] = [\text{HNO}_3]_{dry} - \Delta\text{NO}_3$$

$$[\text{NO}_3^-] = [\text{NH}_4\text{NO}_3] + \Delta\text{NO}_3$$

Combining  $[\text{H}^+] = \frac{[\text{NH}_4^+] K_{\text{H}_2\text{O}}}{[\text{NH}_3] K_{\text{NH}_3}}$  and the expressions for  $[\text{HNO}_3]$  and  $[\text{NO}_3^-]$  with ER5 gives:

$$\Delta\text{NO}_3 = \frac{\frac{K_{\text{NH}_3}}{K_{\text{H}_2\text{O}}} K_{\text{HNO}_3} [\text{NH}_3] [\text{HNO}_3]_{dry} - [\text{NH}_4^+] [\text{NH}_4\text{NO}_3]}{\frac{K_{\text{NH}_3}}{K_{\text{H}_2\text{O}}} K_{\text{HNO}_3} [\text{NH}_3] + [\text{NH}_4^+]}$$

Let:

$$[\text{NH}_3] = [\text{NH}_3]_{dry} - x$$

$$[\text{NH}_4^+] = \text{TA} - [\text{NH}_3] = \text{TA} - ([\text{NH}_3]_{dry} - x) = 2[(\text{NH}_4)_2\text{SO}_4] + [\text{NH}_4\text{NO}_3] + x$$

Substituting expressions for  $[\text{NH}_3]$  and  $[\text{NH}_4^+]$  into  $\Delta\text{NO}_3$  gives:

$$\Delta\text{NO}_3 = \frac{K_{\text{HNO}_3} \frac{K_{\text{NH}_3}}{K_{\text{H}_2\text{O}}} [\text{HNO}_3]_{dry} ([\text{NH}_3]_{dry} - x) - [\text{NH}_4\text{NO}_3] (2[(\text{NH}_4)_2\text{SO}_4] + [\text{NH}_4\text{NO}_3] + x)}{K_{\text{HNO}_3} \frac{K_{\text{NH}_3}}{K_{\text{H}_2\text{O}}} ([\text{NH}_3]_{dry} - x) + 2[(\text{NH}_4)_2\text{SO}_4] + [\text{NH}_4\text{NO}_3] + x}$$

$$[\text{HSO}_4^-] = \Delta c$$

Substituting (3) into (1) gives a quadratic equation to describe  $\Delta c$ .

Let  $b = -([\text{H}^+]_i + [\text{SO}_4^{2-}]_i + K_{\text{HSO}_4})$  and

$$c = [\text{H}^+]_i [\text{SO}_4^{2-}]_i$$

The solution is the *negative* root using the quadratic formula.

$$\Delta c = \frac{-b - \sqrt{b^2 - 4c}}{2}$$

|           |                                                                                                                                                                                                                                                                                                                                                                                                                                                                                                                                                                                                                                                                                                                                                                                                                                                                         |                                                                                                                                                                                                                                                                                                                                                                                                                                                                                                                                                                                                                          |
|-----------|-------------------------------------------------------------------------------------------------------------------------------------------------------------------------------------------------------------------------------------------------------------------------------------------------------------------------------------------------------------------------------------------------------------------------------------------------------------------------------------------------------------------------------------------------------------------------------------------------------------------------------------------------------------------------------------------------------------------------------------------------------------------------------------------------------------------------------------------------------------------------|--------------------------------------------------------------------------------------------------------------------------------------------------------------------------------------------------------------------------------------------------------------------------------------------------------------------------------------------------------------------------------------------------------------------------------------------------------------------------------------------------------------------------------------------------------------------------------------------------------------------------|
|           | <p>Following the calculation of <math>[\text{NO}_3^-]</math> and <math>[\text{NH}_4^+]</math>, <math>[\text{H}^+]</math> is determined from the charge balance (<math>[\text{OH}^-]</math> is replaced using ER4), giving a quadratic equation in terms of <math>[\text{H}^+]</math>:</p> <p>Let <math>b = x - \Delta\text{NO}_3</math> and <math>c = -K_{\text{H}_2\text{O}}\alpha_w</math></p> <p>The solution is the <i>positive</i> root using the quadratic formula:</p> $[\text{H}^+] = \frac{-b + \sqrt{b^2 - 4c}}{2}$ <p>The objective function (from ER2-ER4) is evaluated using the ion and gas concentrations determined above, and its sign (i.e., positive or negative) is then used to initialize the next iteration of the ITP procedure:</p> $\frac{[\text{NH}_4^+]}{\frac{K_{\text{NH}_3}}{K_{\text{H}_2\text{O}}} [\text{H}^+][\text{NH}_3]} - 1 = 0$ |                                                                                                                                                                                                                                                                                                                                                                                                                                                                                                                                                                                                                          |
| <b>E4</b> | <p>The major system is the same as B4.</p>                                                                                                                                                                                                                                                                                                                                                                                                                                                                                                                                                                                                                                                                                                                                                                                                                              | <p><u>The set of initial equations are:</u></p> <p>(1) ER5</p> <p>(2) <math>[\text{H}^+]_i = [\text{H}^+]</math> and TN from the major system.</p> <p>(3) Let</p> $[\text{NO}_3^-] = \Delta c$ $[\text{H}^+] = [\text{H}^+]_i + \Delta c$ $[\text{HNO}_3] = \text{TN} - \Delta c$ <p>Substituting (3) into (1) gives a quadratic equation in terms of <math>\Delta c</math>:</p> <p>Let <math>b = K_{\text{HNO}_3} + [\text{H}^+]_i</math> and <math>c = -K_{\text{HNO}_3} \text{TN}</math></p> <p>The solution is the <i>positive</i> root using the quadratic formula:</p> $\Delta c = \frac{-b + \sqrt{b^2 - 4c}}{2}$ |
| <b>F2</b> | <p>The major system is the same as C2.</p>                                                                                                                                                                                                                                                                                                                                                                                                                                                                                                                                                                                                                                                                                                                                                                                                                              | <p>The minor system is the same as E4.</p>                                                                                                                                                                                                                                                                                                                                                                                                                                                                                                                                                                               |
| <b>G5</b> | <p><u>Begin with dry salt partitioning to obtain:</u></p> $[\text{Na}_2\text{SO}_4] = 0.5\text{TNa}$ $[\text{SO}_4]_{\text{free}} = \text{TS} - [\text{Na}_2\text{SO}_4]$ $[(\text{NH}_4)_2\text{SO}_4] = [\text{SO}_4]_{\text{free}}$ $[\text{NH}_3]_{\text{dry}} = \text{TA} - 2[(\text{NH}_4)_2\text{SO}_4]$ <p><u>All solids are assumed to undergo deliquescence. The set of initial equations are:</u></p> <p>(1) ER2-ER6</p> <p>(2) Mass balance for TS, TA, TN, TCl and TNa</p> $\text{TS} = [\text{SO}_4^{2-}] = [(\text{NH}_4)_2\text{SO}_4] + [\text{Na}_2\text{SO}_4]$ $\text{TA} = [\text{NH}_4^+] + [\text{NH}_3] = [\text{NH}_3]_{\text{dry}} + 2[(\text{NH}_4)_2\text{SO}_4]$ $\text{TN} = [\text{NO}_3^-] + [\text{HNO}_3]$                                                                                                                            | <p>The minor system is the same as D3.</p>                                                                                                                                                                                                                                                                                                                                                                                                                                                                                                                                                                               |

$$TCl = [Cl^-] + [HCl]$$

$$TNa = [Na^+] = 2[Na_2SO_4]$$

(3) Electroneutrality

$$[NH_4^+] + [H^+] + [Na^+] = 2[SO_4^{2-}] + [HSO_4^-] + [Cl^-] + [NO_3^-] + [OH^-]$$

Solution:

The initial step is to perform a root bracketing search the variable  $[Cl^-]$  within the range  $[tiny, TCl - tiny]$  to identify an interval where the 'objective function' contains a sign change (i.e., root), followed by an ITP search to refine  $[Cl^-]$  within the identified interval, if applicable.

System of equations:

The concentrations of  $[SO_4^{2-}]$  and  $[Na^+]$  are constant during the iterative procedure of the major system:

$$[SO_4^{2-}] = [(NH_4)_2SO_4] + [Na_2SO_4]$$

$$[HSO_4^-] = 0$$

$$[Na^+] = 2[Na_2SO_4]$$

Combining the mass balance relationships for TCl and TN with ER5 and ER6 gives:

$$[NO_3^-] = \frac{[Cl^-]TN}{[Cl^-] + \frac{K_{HCl}}{K_{HNO_3}}(TCl - [Cl^-])}$$

$$[HNO_3] = TN - [NO_3^-]$$

$$[Cl^-] = \text{determined from ITP}$$

$$[HCl] = TCl - [Cl^-]$$

Let

$$[NH_3] = [NH_3]_{dry} - \Delta c$$

$$[NH_4^+] = 2[(NH_4)_2SO_4] + \Delta c$$

Substituting the equations for  $[NH_3]$  and  $[NH_4^+]$  into ER2-ER4 and using (3) to eliminate  $[H^+]$ , gives a quadratic equation in terms of  $\Delta c$ :

$$\text{Let } b = - \left( [NH_3]_{dry} + [Cl^-] + [NO_3^-] + \frac{1}{\frac{K_{NH_3}}{K_{H_2O}}} \right) \text{ and}$$

$$c = [NH_3]_{dry}([Cl^-] + [NO_3^-]) - \frac{2[(NH_4)_2SO_4]}{\frac{K_{NH_3}}{K_{H_2O}}}$$

The solution is the *negative* root using the quadratic formula:

$$\Delta c = \frac{-b - \sqrt{b^2 - 4c}}{2}$$

Following the calculation of ion concentrations,  $[H^+]$  is calculated from (3), with two possible cases. Let  $[H^+]^* = 2[SO_4^{2-}] + [NO_3^-] + [Cl^-] - [Na^+] - [NH_4^+]$ .

Case 1:  $[H^+]^* > tiny$  ( $[H^+]$  is in excess)

|                  |                                                                                                                                                                                                                                                                                                                                                                                                                                                                                                                                                                                                                                                                                                                                                                                                                                                                                                                                                                                                                                                                                                                                                                                                                                                                                                                                                                                                                                           |                                            |
|------------------|-------------------------------------------------------------------------------------------------------------------------------------------------------------------------------------------------------------------------------------------------------------------------------------------------------------------------------------------------------------------------------------------------------------------------------------------------------------------------------------------------------------------------------------------------------------------------------------------------------------------------------------------------------------------------------------------------------------------------------------------------------------------------------------------------------------------------------------------------------------------------------------------------------------------------------------------------------------------------------------------------------------------------------------------------------------------------------------------------------------------------------------------------------------------------------------------------------------------------------------------------------------------------------------------------------------------------------------------------------------------------------------------------------------------------------------------|--------------------------------------------|
|                  | <p>Substituting <math>[\text{OH}^-] = \frac{K_{\text{H}_2\text{O}}a_w}{[\text{H}^+]}</math> into (3) gives a quadratic equation in terms of <math>[\text{H}^+]</math>.</p> <p>Let <math>b = -[\text{H}^+]</math> and <math>c = -K_{\text{H}_2\text{O}}a_w</math></p> <p>The solution is the <i>positive</i> root using the quadratic formula:</p> $[\text{H}^+] = \frac{-b + \sqrt{b^2 - 4c}}{2}$ <p><u>Case 2: <math>[\text{H}^+] \leq \text{tiny}</math> (<math>[\text{OH}^-]</math> is in excess)</u></p> <p>Substituting <math>[\text{H}^+] = \frac{K_{\text{H}_2\text{O}}a_w}{[\text{OH}^-]}</math> into (3) results in a quadratic equation in terms of <math>[\text{OH}^-]</math>.</p> <p>Let <math>b = [\text{H}^+]</math> and <math>c = -K_{\text{H}_2\text{O}}a_w</math></p> <p>The solution is the <i>positive</i> root using the quadratic formula (<math>[\text{H}^+]</math> is calculated from the equation substituted initially):</p> $[\text{OH}^-] = \frac{-b + \sqrt{b^2 - 4c}}{2}$ <p>The objective function (from ER6) is evaluated using the ion and gas concentrations determined above, and its sign (i.e., positive or negative) is then used to initialize the next iteration of the ITP procedure:</p> $\frac{[\text{Cl}^-][\text{H}^+]}{K_{\text{HCl}}[\text{HCl}]} - 1 = 0$                                                                                                                                  |                                            |
| <p><b>H6</b></p> | <p><u>Begin with dry salt partitioning to obtain:</u></p> $[\text{Na}_2\text{SO}_4] = \text{TS}$ $[\text{Na}]_{\text{free}} = \text{TNa} - 2[\text{Na}_2\text{SO}_4]$ $[\text{NaNO}_3] = \min([\text{Na}]_{\text{free}}, \text{TN})$ $[\text{HNO}_3]_{\text{dry}} = \text{TN} - [\text{NaNO}_3]$ $[\text{Na}]_{\text{free}} = [\text{Na}]_{\text{free}} - [\text{NaNO}_3]$ $[\text{NaCl}] = \min([\text{Na}]_{\text{free}}, \text{TCl})$ $[\text{Na}]_{\text{free}} = [\text{Na}]_{\text{free}} - [\text{NaCl}]$ $[\text{HCl}]_{\text{dry}} = \text{TCl} - [\text{NaCl}]$ $[\text{NH}_3]_{\text{dry}} = \text{TA}$ <p><u>All solids are assumed to undergo deliquescence. The set of initial equations are:</u></p> <p>(1) Equilibrium reaction ER2–ER6</p> <p>(2) Mass balance for TS, TA, TN, TCl and TNa</p> $\text{TS} = [\text{SO}_4^{2-}] = [\text{Na}_2\text{SO}_4]$ $\text{TA} = [\text{NH}_4^+] + [\text{NH}_3] = [\text{NH}_3]_{\text{dry}}$ $\text{TN} = [\text{NO}_3^-] + [\text{HNO}_3] = [\text{NaNO}_3] + [\text{HNO}_3]_{\text{dry}}$ $\text{TCl} = [\text{Cl}^-] + [\text{HCl}] = [\text{NaCl}] + [\text{HCl}]_{\text{dry}}$ $\text{TNa} = [\text{Na}^+] = [\text{NaNO}_3] + [\text{NaCl}] + 2[\text{Na}_2\text{SO}_4]$ <p>(3) Electroneutrality</p> $[\text{NH}_4^+] + [\text{H}^+] + [\text{Na}^+] = 2[\text{SO}_4^{2-}] + [\text{HSO}_4^-] + [\text{Cl}^-] + [\text{NO}_3^-] + [\text{OH}^-]$ <p><u>Solution:</u></p> | <p>The minor system is the same as D3.</p> |



The initial step is to perform a root bracketing search for the variable  $x$  (representing a change in  $[\text{HCl}]_{dry}$ ) within the range  $[tiny, [\text{HCl}]_{dry} - tiny]$  to identify an interval where the 'objective function' contains a sign change (i.e., root), followed by an ITP search to refine  $x$  within the identified interval, if applicable.

System of equations:

The concentrations of  $[\text{SO}_4^{2-}]$  and  $[\text{Na}^+]$  are constants during the iterative procedure of the major system:

$$[\text{SO}_4^{2-}] = [\text{Na}_2\text{SO}_4]$$

$$[\text{HSO}_4^-] = 0$$

$$[\text{Na}^+] = [\text{NaNO}_3] + [\text{NaCl}] + 2[\text{Na}_2\text{SO}_4]$$

Let

$$[\text{Cl}^-] = [\text{NaCl}] + x$$

$$[\text{HCl}] = [\text{HCl}]_{dry} - x$$

$$[\text{NO}_3^-] = [\text{NaNO}_3] + y$$

$$[\text{HNO}_3] = [\text{HNO}_3]_{dry} - y$$

Using  $[\text{H}^+] = \frac{K_{\text{HCl}}([\text{HCl}]_{dry} - x)}{[\text{NaCl}] + x}$  and the expressions for  $[\text{NO}_3^-]$  and  $[\text{HNO}_3]$  in ER5 and solving

for  $y$  gives

$$y = \frac{[\text{HNO}_3]_{dry}([\text{NaCl}] + x) - \frac{K_{\text{HCl}}}{K_{\text{HNO}_3}}([\text{HCl}]_{dry} - x)[\text{NaNO}_3]}{([\text{NaCl}] + x) + \frac{K_{\text{HCl}}}{K_{\text{HNO}_3}}([\text{HCl}]_{dry} - x)}$$

Let

$$[\text{NH}_4^+] = \Delta c$$

$$[\text{NH}_3] = [\text{NH}_3]_{dry} - \Delta c$$

Using the expressions for  $[\text{NH}_4^+]$  and  $[\text{NH}_3]$  in (3), solving for  $[\text{H}^+]$ , and substituting the result for  $[\text{H}^+]$  into ER2-ER4 gives a quadratic equation for  $\Delta c$ :

$$\text{Let } b = -\left([\text{NH}_3]_{dry} + x + y + \frac{1}{\frac{K_{\text{NH}_3}}{K_{\text{H}_2\text{O}}}}\right) \text{ and } c = [\text{NH}_3]_{dry}(x + y)$$

The solution is the *negative* root using the quadratic formula:

$$\Delta c = \frac{-b - \sqrt{b^2 - 4c}}{2}$$

$[\text{H}^+]$  is then determined exactly as in G5, but using the ion concentrations calculated above.

The objective function (from ER2-4 and ER6) is evaluated using the ion and gas concentrations determined above, and its sign (i.e., positive or negative) is then used to initialize the next iteration of the ITP procedure:

$$\frac{[\text{NH}_4^+][\text{Cl}^-]}{[\text{HCl}][\text{NH}_3]K_{\text{HCl}} \frac{K_{\text{NH}_3}}{K_{\text{H}_2\text{O}}}} - 1 = 0$$

|                  |                                                                                                                                                                                                                                                                                                                                                                                                                                                                                                                                                                                                                                                                                                                                                                                                                                                                                                                                                                                                                                                                                                                                                                                                                                                                                                                                                                                                                                                                                                                                                                                                                                                                                                                                                                                                                                                                                                                                                                                                                                                                                                                                                                                                                                                                                                                                                                                                                                                                                                                                                                                                                                                                                                                                                                                                                                                                                                                                                                                                                                                                                                                                                                                                                         |                                                                                                                                                                                                                                                                                                                                                                                                                                                                                                                                                                                                                                                                                                                                                                                                                                                                                                                                                                                                                                                                                                                                                                                                                                                                                                                                                                                                                                                                                                                                                                                                                                                                                                                                                                                                                                                                                                                                                                                  |
|------------------|-------------------------------------------------------------------------------------------------------------------------------------------------------------------------------------------------------------------------------------------------------------------------------------------------------------------------------------------------------------------------------------------------------------------------------------------------------------------------------------------------------------------------------------------------------------------------------------------------------------------------------------------------------------------------------------------------------------------------------------------------------------------------------------------------------------------------------------------------------------------------------------------------------------------------------------------------------------------------------------------------------------------------------------------------------------------------------------------------------------------------------------------------------------------------------------------------------------------------------------------------------------------------------------------------------------------------------------------------------------------------------------------------------------------------------------------------------------------------------------------------------------------------------------------------------------------------------------------------------------------------------------------------------------------------------------------------------------------------------------------------------------------------------------------------------------------------------------------------------------------------------------------------------------------------------------------------------------------------------------------------------------------------------------------------------------------------------------------------------------------------------------------------------------------------------------------------------------------------------------------------------------------------------------------------------------------------------------------------------------------------------------------------------------------------------------------------------------------------------------------------------------------------------------------------------------------------------------------------------------------------------------------------------------------------------------------------------------------------------------------------------------------------------------------------------------------------------------------------------------------------------------------------------------------------------------------------------------------------------------------------------------------------------------------------------------------------------------------------------------------------------------------------------------------------------------------------------------------------|----------------------------------------------------------------------------------------------------------------------------------------------------------------------------------------------------------------------------------------------------------------------------------------------------------------------------------------------------------------------------------------------------------------------------------------------------------------------------------------------------------------------------------------------------------------------------------------------------------------------------------------------------------------------------------------------------------------------------------------------------------------------------------------------------------------------------------------------------------------------------------------------------------------------------------------------------------------------------------------------------------------------------------------------------------------------------------------------------------------------------------------------------------------------------------------------------------------------------------------------------------------------------------------------------------------------------------------------------------------------------------------------------------------------------------------------------------------------------------------------------------------------------------------------------------------------------------------------------------------------------------------------------------------------------------------------------------------------------------------------------------------------------------------------------------------------------------------------------------------------------------------------------------------------------------------------------------------------------------|
| <p><b>I6</b></p> | <p><u>Begin with dry salt partitioning to obtain:</u></p> $[\text{Na}_2\text{SO}_4] = 0.5\text{TNa}$ $[\text{Na}]_{\text{free}} = \text{TNa} - 2[\text{Na}_2\text{SO}_4]$ $[\text{SO}_4]_{\text{free}} = \text{TS} - [\text{Na}_2\text{SO}_4]$ $[(\text{NH}_4)_3\text{H}(\text{SO}_4)_2] = \min\left(\frac{1}{3}\text{TA}, \frac{1}{2}[\text{SO}_4]_{\text{free}}\right)$ $[\text{SO}_4]_{\text{free}} = [\text{SO}_4]_{\text{free}} - 2[(\text{NH}_4)_3\text{H}(\text{SO}_4)_2]$ $[\text{NH}_4]_{\text{free}} = \text{TA} - 3[(\text{NH}_4)_3\text{H}(\text{SO}_4)_2]$ $[\text{NH}_3]_{\text{dry}} = 0$ $[\text{HNO}_3]_{\text{dry}} = \text{TN}$ $[\text{HCl}]_{\text{dry}} = \text{TCl}$ <p><u>Based on the above partitioning, there are three possible cases:</u></p> <p><u>Case 1:</u> <math>[\text{SO}_4]_{\text{free}} \leq \text{tiny}</math></p> $[(\text{NH}_4)_3\text{H}(\text{SO}_4)_2] = [(\text{NH}_4)_3\text{H}(\text{SO}_4)_2] - [\text{NH}_4]_{\text{free}}$ $[(\text{NH}_4)_2\text{SO}_4] = 2[\text{NH}_4]_{\text{free}}$ <p><u>Case 2 (only if Case 1 = false):</u> <math>[\text{NH}_4]_{\text{free}} \leq \text{tiny}</math> and <math>[\text{Na}_2\text{SO}_4] \leq \text{tiny}</math></p> $[\text{NH}_4\text{HSO}_4] = 3 \min([\text{SO}_4]_{\text{free}}, [(\text{NH}_4)_3\text{H}(\text{SO}_4)_2])$ $[(\text{NH}_4)_3\text{H}(\text{SO}_4)_2] = [(\text{NH}_4)_3\text{H}(\text{SO}_4)_2] - [\text{SO}_4]_{\text{free}}$ <p><u>Case 3 (only if Case 1 and Case 2 = false):</u> <math>[\text{NH}_4]_{\text{free}} \leq \text{tiny}</math> and <math>[\text{Na}_2\text{SO}_4] &gt; \text{tiny}</math>:</p> $[\text{NH}_4\text{HSO}_4] = 3 \min([\text{SO}_4]_{\text{free}}, [(\text{NH}_4)_3\text{H}(\text{SO}_4)_2])$ $[(\text{NH}_4)_3\text{H}(\text{SO}_4)_2] = [(\text{NH}_4)_3\text{H}(\text{SO}_4)_2] - [\text{SO}_4]_{\text{free}}$ $[\text{SO}_4]_{\text{free}} = [\text{SO}_4]_{\text{free}} - \frac{1}{3}[\text{NH}_4\text{HSO}_4]$ $[\text{NaHSO}_4] = 2[\text{SO}_4]_{\text{free}}$ $[\text{Na}_2\text{SO}_4] = [\text{Na}_2\text{SO}_4] - [\text{SO}_4]_{\text{free}}$ $[\text{Na}]_{\text{free}} = \text{TNa} - 2[\text{Na}_2\text{SO}_4] - [\text{NaHSO}_4]$ <p><u>All solids are assumed to undergo deliquescence. The set of initial equations are:</u></p> <p>(1) Equilibrium reaction ER2-ER6</p> <p>(2) Mass balance for TS, TA, TN, TCl and TNa</p> $\text{TS} = 2[(\text{NH}_4)_3\text{H}(\text{SO}_4)_2] + [\text{Na}_2\text{SO}_4] + [\text{NH}_4\text{HSO}_4] + [(\text{NH}_4)_2\text{SO}_4] + [\text{NaHSO}_4]$ $\text{TA} = 3[(\text{NH}_4)_3\text{H}(\text{SO}_4)_2] + 2[(\text{NH}_4)_2\text{SO}_4] + [\text{NH}_4\text{HSO}_4]$ $\text{TN} = [\text{HNO}_3]_{\text{dry}}$ $\text{TCl} = [\text{HCl}]_{\text{dry}}$ $\text{TNa} = 2[\text{Na}_2\text{SO}_4] + [\text{NaHSO}_4]$ <p><u>Solution:</u></p> <p>The concentrations of <math>[\text{Na}^+]</math> and <math>[\text{NH}_4^+]</math> remain constant during the iterative procedure of the major system; <math>[\text{Cl}^-]</math> and <math>[\text{NO}_3^-]</math> are zero.</p> $[\text{NH}_4^+] = 3[(\text{NH}_4)_3\text{H}(\text{SO}_4)_2] + 2[(\text{NH}_4)_2\text{SO}_4] + [\text{NH}_4\text{HSO}_4]$ | <p>There are five possible cases, based on the aerosol liquid water content determined in the major system in conjunction with TCl and TN :</p> <p><u>Case 1:</u> <math>[\text{H}_2\text{O}] \leq \text{tiny}</math></p> $[\text{Cl}^-] = [\text{Cl}^-]_i$ $[\text{NO}_3^-] = [\text{NO}_3^-]_i$ $[\text{HCl}] = \text{TCl} - [\text{Cl}^-]_i$ $[\text{HNO}_3] = \text{TN} - [\text{NO}_3^-]_i$ <p>(Note that in I6, <math>[\text{Cl}^-]_i = 0</math> and <math>[\text{NO}_3^-]_i = 0</math> in the major system)</p> <p><u>Case 2 (if Case 1 = false):</u> TCl &lt; tiny and TN &lt; tiny</p> $[\text{Cl}^-] = 0$ $[\text{NO}_3^-] = 0$ $[\text{HCl}] = \text{tiny}$ $[\text{HNO}_3] = \text{tiny}$ <p><u>Case 3 (if Case 1 and 2 = false):</u> TCl &lt; tiny but not TN</p> <p>Let <math>b = K_{\text{HNO}_3} + [\text{H}^+]_i</math> and <math>c = -K_{\text{HNO}_3}\text{TN}</math></p> <p>The solution is the <i>positive</i> root of the quadratic formula:</p> $[\text{NO}_3^-] = \frac{-b + \sqrt{b^2 - 4c}}{2}$ $[\text{HNO}_3] = \text{TN} - [\text{NO}_3^-]$ $[\text{H}^+] = [\text{H}^+]_i + [\text{NO}_3^-]$ <p><u>Case 4 (if Case 1, 2 and 3 = false):</u> TN &lt; tiny but not TCl</p> <p>Let <math>b = K_{\text{HCl}} + [\text{H}^+]_i</math> and <math>c = -K_{\text{HCl}}\text{TCl}</math></p> <p>The solution is the <i>positive</i> root of the quadratic formula:</p> $[\text{Cl}^-] = \frac{-b + \sqrt{b^2 - 4c}}{2}$ $[\text{HCl}] = \text{TCl} - [\text{Cl}^-]$ $[\text{H}^+] = [\text{H}^+]_i + [\text{Cl}^-]$ <p><u>Case 5 (if Case 1, 2, 3 and 4 = false):</u></p> <p>Let <math>a = 1</math>,</p> $b = \frac{K_{\text{HNO}_3}\text{TN} + K_{\text{HCl}}\text{TCl} + ([\text{H}^+]_i + K_{\text{HCl}})(K_{\text{HNO}_3} - K_{\text{HCl}})}{K_{\text{HNO}_3} - K_{\text{HCl}}}$ $c = \frac{([\text{H}^+]_i + K_{\text{HCl}})K_{\text{HCl}}\text{TCl} - K_{\text{HCl}}\text{TCl}(K_{\text{HNO}_3} - K_{\text{HCl}})}{K_{\text{HNO}_3} - K_{\text{HCl}}}$ |
|------------------|-------------------------------------------------------------------------------------------------------------------------------------------------------------------------------------------------------------------------------------------------------------------------------------------------------------------------------------------------------------------------------------------------------------------------------------------------------------------------------------------------------------------------------------------------------------------------------------------------------------------------------------------------------------------------------------------------------------------------------------------------------------------------------------------------------------------------------------------------------------------------------------------------------------------------------------------------------------------------------------------------------------------------------------------------------------------------------------------------------------------------------------------------------------------------------------------------------------------------------------------------------------------------------------------------------------------------------------------------------------------------------------------------------------------------------------------------------------------------------------------------------------------------------------------------------------------------------------------------------------------------------------------------------------------------------------------------------------------------------------------------------------------------------------------------------------------------------------------------------------------------------------------------------------------------------------------------------------------------------------------------------------------------------------------------------------------------------------------------------------------------------------------------------------------------------------------------------------------------------------------------------------------------------------------------------------------------------------------------------------------------------------------------------------------------------------------------------------------------------------------------------------------------------------------------------------------------------------------------------------------------------------------------------------------------------------------------------------------------------------------------------------------------------------------------------------------------------------------------------------------------------------------------------------------------------------------------------------------------------------------------------------------------------------------------------------------------------------------------------------------------------------------------------------------------------------------------------------------------|----------------------------------------------------------------------------------------------------------------------------------------------------------------------------------------------------------------------------------------------------------------------------------------------------------------------------------------------------------------------------------------------------------------------------------------------------------------------------------------------------------------------------------------------------------------------------------------------------------------------------------------------------------------------------------------------------------------------------------------------------------------------------------------------------------------------------------------------------------------------------------------------------------------------------------------------------------------------------------------------------------------------------------------------------------------------------------------------------------------------------------------------------------------------------------------------------------------------------------------------------------------------------------------------------------------------------------------------------------------------------------------------------------------------------------------------------------------------------------------------------------------------------------------------------------------------------------------------------------------------------------------------------------------------------------------------------------------------------------------------------------------------------------------------------------------------------------------------------------------------------------------------------------------------------------------------------------------------------------|

|                  |                                                                                                                                                                                                                                                                                                                                                                                                                                                                                                                                                                                                                                                                                                                                                                                                                                                                                                                                                                                                                                                                                                                                                                                                                                                                                                                                                                                                                                                |                                                                                                                                                                                                                                                                                                                                                                                                                                                                                                                                                                                                                                                                                                                                                                                                                                                                                                                                                                                        |
|------------------|------------------------------------------------------------------------------------------------------------------------------------------------------------------------------------------------------------------------------------------------------------------------------------------------------------------------------------------------------------------------------------------------------------------------------------------------------------------------------------------------------------------------------------------------------------------------------------------------------------------------------------------------------------------------------------------------------------------------------------------------------------------------------------------------------------------------------------------------------------------------------------------------------------------------------------------------------------------------------------------------------------------------------------------------------------------------------------------------------------------------------------------------------------------------------------------------------------------------------------------------------------------------------------------------------------------------------------------------------------------------------------------------------------------------------------------------|----------------------------------------------------------------------------------------------------------------------------------------------------------------------------------------------------------------------------------------------------------------------------------------------------------------------------------------------------------------------------------------------------------------------------------------------------------------------------------------------------------------------------------------------------------------------------------------------------------------------------------------------------------------------------------------------------------------------------------------------------------------------------------------------------------------------------------------------------------------------------------------------------------------------------------------------------------------------------------------|
|                  | <p> <math>[\text{Na}^+] = 2[\text{Na}_2\text{SO}_4] + [\text{NaHSO}_4]</math><br/> <math>[\text{Cl}^-] = 0</math><br/> <math>[\text{NO}_3^-] = 0</math> </p> <p>Let</p> <p> <math>[\text{SO}_4^{2-}] = [(\text{NH}_4)_3\text{H}(\text{SO}_4)_2] + [\text{Na}_2\text{SO}_4] + [(\text{NH}_4)_2\text{SO}_4] + \Delta c</math><br/> <math>[\text{HSO}_4^-] = [(\text{NH}_4)_3\text{H}(\text{SO}_4)_2] + [\text{NH}_4\text{HSO}_4] + [\text{NaHSO}_4] - \Delta c</math><br/> <math>[\text{H}^+] = \Delta c</math> </p> <p>Using the expressions for <math>[\text{SO}_4^{2-}]</math>, <math>[\text{HSO}_4^-]</math> and <math>[\text{H}^+]</math> in (1) gives a quadratic equation in terms of <math>\Delta c</math>.</p> <p>Let <math>b = [(\text{NH}_4)_3\text{H}(\text{SO}_4)_2] + [\text{Na}_2\text{SO}_4] + [(\text{NH}_4)_2\text{SO}_4] + K_{\text{HSO}_4}</math> and</p> <p><math>c = -K_{\text{HSO}_4}([(\text{NH}_4)_3\text{H}(\text{SO}_4)_2] + [\text{NH}_4\text{HSO}_4] + [\text{NaHSO}_4])</math></p> <p>The solution is the <i>positive</i> root using the quadratic formula:</p> $\Delta c = \frac{-b + \sqrt{b^2 - 4c}}{2}$                                                                                                                                                                                                                                                                                                        | $d = -\frac{K_{\text{HCl}}^2 \text{TCl}^2}{K_{\text{HNO}_3} - K_{\text{HCl}}}$ <p>The solution is the solution to a cubic equation of the form:</p> $a\Delta c^3 + b\Delta c^2 + c\Delta c + d = 0$ <p>Where <math>\Delta c</math> is determined from an exact analytic solution or using ITP, with</p> <p> <math>[\text{Cl}^-] = \text{TCl} + \Delta c</math><br/> <math>[\text{HCl}] = \text{TCl} - [\text{Cl}^-]</math><br/> <math>[\text{NO}_3^-] = \text{TN} + \Delta r</math><br/> <math>[\text{HNO}_3] = \text{TN} - [\text{NO}_3^-]</math><br/> <math>[\text{H}^+] = [\text{H}^+]_i + \Delta c + \Delta r</math> </p> <p>where</p> $\Delta r = \min\left(\frac{K_{\text{HNO}_3} \text{TN} \Delta c}{K_{\text{HCl}} \text{TCl} + \Delta c (K_{\text{HNO}_3} - K_{\text{HCl}})}, \text{TN}\right)$ <p>Next, TA is partitioned, following the same procedure as the minor system of Case B4, but using <math>[\text{H}^+]</math> from determined from the minor system above.</p> |
| <p><b>J3</b></p> | <p><u>Begin with dry salt partitioning to obtain:</u></p> <p> <math>[\text{NH}_4\text{HSO}_4] = \text{TA}</math><br/> <math>[\text{NaHSO}_4] = \text{TNa}</math><br/> <math>[\text{SO}_4]_{\text{free}} = \text{TS} - [\text{NH}_4\text{HSO}_4] - [\text{NaHSO}_4]</math><br/> <math>[\text{HNO}_3]_{\text{dry}} = \text{TN}</math><br/> <math>[\text{HCl}]_{\text{dry}} = \text{TCl}</math> </p> <p><u>The set of initial equations are:</u></p> <p>(1) ER1</p> <p>(2) Mass balance for TS, TA, TN, TCl and TNa</p> <p> <math>\text{TS} = [\text{SO}_4^{2-}] + [\text{HSO}_4^-] = [\text{NH}_4\text{HSO}_4] + [\text{NaHSO}_4] + [\text{SO}_4]_{\text{free}}</math><br/> <math>\text{TA} = [\text{NH}_4^+] = [\text{NH}_4\text{HSO}_4]</math><br/> <math>\text{TN} = [\text{HNO}_3]_{\text{dry}}</math><br/> <math>\text{TCl} = [\text{HCl}]_{\text{dry}}</math><br/> <math>\text{TNa} = [\text{Na}^+] = [\text{NaHSO}_4]</math> </p> <p>(3) Electroneutrality</p> <p> <math>[\text{NH}_4^+] + [\text{H}^+] + [\text{Na}^+] = 2[\text{SO}_4^{2-}] + [\text{HSO}_4^-] + [\text{Cl}^-] + [\text{NO}_3^-]</math> </p> <p><u>Solution:</u></p> <p>The concentrations of <math>[\text{Na}^+]</math> and <math>[\text{NH}_4^+]</math> remain constant during the iterative procedure of the major system; <math>[\text{Cl}^-]</math> and <math>[\text{NO}_3^-]</math> are zero.</p> <p><math>[\text{NH}_4^+] = [\text{NH}_4\text{HSO}_4]</math></p> | <p>The minor system is the same as I6.</p>                                                                                                                                                                                                                                                                                                                                                                                                                                                                                                                                                                                                                                                                                                                                                                                                                                                                                                                                             |

|                  |                                                                                                                                                                                                                                                                                                                                                                                                                                                                                                                                                                                                                                                                                                                                                                                                                                                                                                                                                                                                                                                                                                                                                                                                                                                                                                                                                                                                                                                                                                                                                                                                                                                                                                                                                                                                                                                                                                                                                                                                                                                                                                                                                                                                                                                                                                                                                                                   |                                            |
|------------------|-----------------------------------------------------------------------------------------------------------------------------------------------------------------------------------------------------------------------------------------------------------------------------------------------------------------------------------------------------------------------------------------------------------------------------------------------------------------------------------------------------------------------------------------------------------------------------------------------------------------------------------------------------------------------------------------------------------------------------------------------------------------------------------------------------------------------------------------------------------------------------------------------------------------------------------------------------------------------------------------------------------------------------------------------------------------------------------------------------------------------------------------------------------------------------------------------------------------------------------------------------------------------------------------------------------------------------------------------------------------------------------------------------------------------------------------------------------------------------------------------------------------------------------------------------------------------------------------------------------------------------------------------------------------------------------------------------------------------------------------------------------------------------------------------------------------------------------------------------------------------------------------------------------------------------------------------------------------------------------------------------------------------------------------------------------------------------------------------------------------------------------------------------------------------------------------------------------------------------------------------------------------------------------------------------------------------------------------------------------------------------------|--------------------------------------------|
|                  | <p> <math>[\text{Na}^+] = [\text{NaHSO}_4]</math><br/> <math>[\text{Cl}^-] = 0</math><br/> <math>[\text{NO}_3^-] = 0</math> </p> <p>Using (2) and (3) in (1) gives a quadratic equation in terms of <math>[\text{SO}_4^{2-}]</math>.</p> <p>Let <math>b = K_{\text{HSO}_4} + [\text{SO}_4]_{\text{free}}</math> and <math>c = -K_{\text{HSO}_4}([\text{NH}_4\text{HSO}_4] + [\text{NaHSO}_4] + [\text{SO}_4]_{\text{free}})</math></p> <p>The solution is the <i>positive</i> root using the quadratic formula:</p> $[\text{SO}_4^{2-}] = \frac{-b + \sqrt{b^2 - 4c}}{2}$ <p> <math>[\text{HSO}_4^-] = \text{TS} - [\text{SO}_4^{2-}] = [\text{NH}_4\text{HSO}_4] + [\text{NaHSO}_4] + [\text{SO}_4]_{\text{free}} - [\text{SO}_4^{2-}]</math><br/> <math>[\text{H}^+] = [\text{SO}_4]_{\text{free}} + [\text{SO}_4^{2-}]</math> </p>                                                                                                                                                                                                                                                                                                                                                                                                                                                                                                                                                                                                                                                                                                                                                                                                                                                                                                                                                                                                                                                                                                                                                                                                                                                                                                                                                                                                                                                                                                                                             |                                            |
| <p><b>07</b></p> | <p><u>Begin with dry salt partitioning to obtain:</u></p> <p> <math>[\text{CaSO}_4] = \min(\text{TCa}, \text{TS})</math><br/> <math>[\text{SO}_4]_{\text{free}} = \text{TS} - [\text{CaSO}_4]</math><br/> <math>[\text{Ca}]_{\text{free}} = \text{TCa} - [\text{CaSO}_4]</math> </p> <p> <math>[\text{K}_2\text{SO}_4] = \min\left(\frac{1}{2}\text{TK}, [\text{SO}_4]_{\text{free}}\right)</math><br/> <math>[\text{SO}_4]_{\text{free}} = [\text{SO}_4]_{\text{free}} - [\text{K}_2\text{SO}_4]</math><br/> <math>[\text{K}]_{\text{free}} = \text{TK} - 2[\text{K}_2\text{SO}_4]</math> </p> <p> <math>[\text{Na}_2\text{SO}_4] = \min\left(\frac{1}{2}\text{TNa}, [\text{SO}_4]_{\text{free}}\right)</math><br/> <math>[\text{SO}_4]_{\text{free}} = [\text{SO}_4]_{\text{free}} - [\text{Na}_2\text{SO}_4]</math><br/> <math>[\text{Na}]_{\text{free}} = \text{TNa} - 2[\text{Na}_2\text{SO}_4]</math> </p> <p> <math>[\text{MgSO}_4] = \min(\text{TMg}, [\text{SO}_4]_{\text{free}})</math><br/> <math>[\text{SO}_4]_{\text{free}} = [\text{SO}_4]_{\text{free}} - [\text{MgSO}_4]</math><br/> <math>[\text{Mg}]_{\text{free}} = \text{TMg} - [\text{MgSO}_4]</math> </p> <p> <math>[(\text{NH}_4)_2\text{SO}_4] = [\text{SO}_4]_{\text{free}}</math><br/> <math>[\text{HNO}_3]_{\text{dry}} = \text{TN}</math><br/> <math>[\text{HCl}]_{\text{dry}} = \text{TCl}</math><br/> <math>[\text{NH}_3]_{\text{dry}} = \text{TA} - 2[(\text{NH}_4)_2\text{SO}_4]</math> </p> <p><u>The set of initial equations are:</u></p> <p>(1) ER2–ER6</p> <p>(2) Mass balance for TS, TA, TN, TCl, TNa, TCa, TMg, TK</p> <p> <math>\text{TS} = [\text{CaSO}_4] + [\text{K}_2\text{SO}_4] + [\text{Na}_2\text{SO}_4] + [\text{MgSO}_4] + [(\text{NH}_4)_2\text{SO}_4]</math><br/> <math>\text{TA} = [\text{NH}_3]_{\text{dry}} + 2[(\text{NH}_4)_2\text{SO}_4]</math><br/> <math>\text{TN} = [\text{HNO}_3]_{\text{dry}} = [\text{NO}_3^-] + [\text{HNO}_3]</math><br/> <math>\text{TCl} = [\text{HCl}]_{\text{dry}} = [\text{Cl}^-] + [\text{HCl}]</math><br/> <math>\text{TNa} = 2[\text{Na}_2\text{SO}_4] + [\text{Na}]_{\text{free}}</math><br/> <math>\text{TMg} = [\text{MgSO}_4] + [\text{Mg}]_{\text{free}}</math><br/> <math>\text{TK} = 2[\text{K}_2\text{SO}_4] + [\text{K}]_{\text{free}}</math><br/> <math>\text{TCa} = [\text{CaSO}_4] + [\text{Ca}]_{\text{free}}</math> </p> | <p>The minor system is the same as D3.</p> |

(3) Electroneutrality

$$\begin{aligned}[\text{NH}_4^+] + [\text{H}^+] + [\text{Na}^+] + 2[\text{Mg}^{2+}] + [\text{K}^+] + 2[\text{Ca}^{2+}] \\ = 2[\text{SO}_4^{2-}] + [\text{HSO}_4^-] + [\text{Cl}^-] + [\text{NO}_3^-] + [\text{OH}^-]\end{aligned}$$

Solution:

The initial step is to perform a root bracketing search the variable  $[\text{Cl}^-]$  within the range  $[\text{tiny}, \text{TCl} - \text{tiny}]$  to identify an interval where the 'objective function' contains a sign change (i.e., root), followed by an ITP search to refine  $[\text{Cl}^-]$  within the identified interval, if applicable.

All solids (except  $\text{CaSO}_4$ ) are assumed to undergo deliquescence. System of equations:

The concentrations of  $[\text{Na}^+]$ ,  $[\text{SO}_4^{2-}]$ ,  $[\text{Mg}^{2+}]$  and  $[\text{K}^+]$  remain constant during the iterative procedure of the major system.

$$[\text{SO}_4^{2-}] = [\text{K}_2\text{SO}_4] + [\text{Na}_2\text{SO}_4] + [\text{MgSO}_4] + [(\text{NH}_4)_2\text{SO}_4]$$

$$[\text{HSO}_4^-] = 0$$

$$[\text{Na}^+] = 2[\text{Na}_2\text{SO}_4]$$

$$[\text{Mg}^{2+}] = [\text{MgSO}_4]$$

$$[\text{K}^+] = 2[\text{K}_2\text{SO}_4]$$

$$[\text{Ca}^{2+}] = 0$$

Combining the mass balance relationships for TCl and TN with ER5 and ER6 gives:

$$[\text{NO}_3^-] = \frac{[\text{Cl}^-]\text{TN}}{[\text{Cl}^-] + \frac{K_{\text{HCl}}}{K_{\text{HNO}_3}}(\text{TCl} - [\text{Cl}^-])}$$

$$[\text{HNO}_3] = \text{TN} - [\text{NO}_3^-]$$

$$[\text{Cl}^-] = \text{determined from ITP}$$

$$[\text{HCl}] = \text{TCl} - [\text{Cl}^-]$$

Let

$$[\text{NH}_3] = [\text{NH}_3]_{\text{dry}} - \Delta c$$

$$[\text{NH}_4^+] = 2[(\text{NH}_4)_2\text{SO}_4] + \Delta c$$

Substituting the equations for  $[\text{NH}_3]$  and  $[\text{NH}_4^+]$  into ER2-ER4 and using (3) to eliminate  $[\text{H}^+]$ , gives a quadratic equation in terms of  $\Delta c$ :

$$\text{Let } b = - \left( [\text{NH}_3]_{\text{dry}} + [\text{Cl}^-] + [\text{NO}_3^-] + \frac{1}{\frac{K_{\text{NH}_3}}{K_{\text{H}_2\text{O}}}} \right) \text{ and}$$

$$c = [\text{NH}_3]_{\text{dry}}([\text{Cl}^-] + [\text{NO}_3^-]) - \frac{2[(\text{NH}_4)_2\text{SO}_4]}{\frac{K_{\text{NH}_3}}{K_{\text{H}_2\text{O}}}}$$

The solution is the *negative* root using the quadratic formula:

$$\Delta c = \frac{-b - \sqrt{b^2 - 4c}}{2}$$

$[\text{H}^+]$  is then calculated the same as G5, except now (3) includes  $[\text{Mg}^{2+}]$  and  $[\text{K}^+]$  (note  $[\text{Ca}^{2+}] = 0$  and  $[\text{HSO}_4^-] = 0$ ):

|           |                                                                                                                                                                                                                                                                                                                                                                                                                                                                                                                                                                                                                                                                                                                                                                                                                                                                                                                                                                                                                                                                                                                                                                                                                                                                                                                                                 |                                            |
|-----------|-------------------------------------------------------------------------------------------------------------------------------------------------------------------------------------------------------------------------------------------------------------------------------------------------------------------------------------------------------------------------------------------------------------------------------------------------------------------------------------------------------------------------------------------------------------------------------------------------------------------------------------------------------------------------------------------------------------------------------------------------------------------------------------------------------------------------------------------------------------------------------------------------------------------------------------------------------------------------------------------------------------------------------------------------------------------------------------------------------------------------------------------------------------------------------------------------------------------------------------------------------------------------------------------------------------------------------------------------|--------------------------------------------|
|           | $[H^+]^* = 2[SO_4^{2-}] + [NO_3^-] + [Cl^-] - [Na^+] - [NH_4^+] - 2[Mg^{2+}] - [K^+]$ <p>The objective function (ER6) is evaluated using the ion and gas concentrations determined above, and its sign (i.e., positive or negative) is then used to initialize the next iteration of the ITP procedure:</p> $\frac{[Cl^-][H^+]}{K_{HCl}[HCl]} - 1 = 0$                                                                                                                                                                                                                                                                                                                                                                                                                                                                                                                                                                                                                                                                                                                                                                                                                                                                                                                                                                                          |                                            |
| <b>M8</b> | <p><u>Begin with dry salt partitioning to obtain:</u></p> $[CaSO_4] = \min(TCa, TS)$ $[SO_4]_{free} = TS - [CaSO_4]$ $[Ca]_{free} = TCa - [CaSO_4]$ $[K_2SO_4] = \min\left(\frac{1}{2}TK, [SO_4]_{free}\right)$ $[SO_4]_{free} = [SO_4]_{free} - [K_2SO_4]$ $[K]_{free} = TK - 2[K_2SO_4]$ $[MgSO_4] = \min(TMg, [SO_4]_{free})$ $[SO_4]_{free} = [SO_4]_{free} - [MgSO_4]$ $[Mg]_{free} = TMg - [MgSO_4]$ $[Na_2SO_4] = [SO_4]_{free}$ $[Na]_{free} = TNa - 2[Na_2SO_4]$ $[NaNO_3] = \min(TN, [Na]_{free})$ $[Na]_{free} = [Na]_{free} - [NaNO_3]$ $[NaCl] = \min(TCl, [Na]_{free})$ $[Na]_{free} = [Na]_{free} - [NaCl]$ $[NH_3]_{dry} = TA$ $[HNO_3]_{dry} = TN - [NaNO_3]$ $[HCl]_{dry} = TCl - [NaCl]$ <p><u>The set of initial equations are:</u></p> <p>(1) ER2–ER6</p> <p>(2) Mass balance for TS, TA, TN, TCl, TNa, TCa, TMg, TK</p> $TS = [CaSO_4] + [K_2SO_4] + [Na_2SO_4] + [MgSO_4]$ $TA = [NH_3]_{dry} = [NH_4^+] + [NH_3]$ $TN = [HNO_3]_{dry} + [NaNO_3] = [NO_3^-] + [HNO_3]$ $TCl = [HCl]_{dry} + [NaCl] = [Cl^-] + [HCl]$ $TNa = 2[Na_2SO_4] + [NaNO_3] + [NaCl] = [Na^+]$ $TMg = [MgSO_4] + [Mg]_{free}$ $TK = 2[K_2SO_4] + [K]_{free}$ $TCa = [CaSO_4] + [Ca]_{free}$ <p>(3) Electroneutrality</p> $[NH_4^+] + [H^+] + [Na^+] + 2[Mg^{2+}] + [K^+] + 2[Ca^{2+}]$ $= 2[SO_4^{2-}] + [HSO_4^-] + [Cl^-] + [NO_3^-] + [OH^-]$ | <p>The minor system is the same as D3.</p> |

Solution:

The initial step is to perform a root bracketing search for the variable  $x$  (representing a change in  $[\text{HCl}]_{dry}$ ) within the range  $[tiny, [\text{HCl}]_{dry} - tiny]$  to identify an interval where the 'objective function' contains a sign change (i.e., root), followed by an ITP search to refine  $x$  within the identified interval, if applicable.

All solids (except  $\text{CaSO}_4$ ) are assumed to undergo deliquescence. System of equations:

The concentrations of  $[\text{Na}^+]$ ,  $[\text{SO}_4^{2-}]$ ,  $[\text{Mg}^{2+}]$  and  $[\text{K}^+]$  remain constant during the iterative procedure of the major system.

$$[\text{SO}_4^{2-}] = [\text{K}_2\text{SO}_4] + [\text{Na}_2\text{SO}_4] + [\text{MgSO}_4]$$

$$[\text{HSO}_4^-] = 0$$

$$[\text{Na}^+] = 2[\text{Na}_2\text{SO}_4] + [\text{NaNO}_3] + [\text{NaCl}]$$

$$[\text{Mg}^{2+}] = [\text{MgSO}_4]$$

$$[\text{K}^+] = 2[\text{K}_2\text{SO}_4]$$

$$[\text{Ca}^{2+}] = 0$$

Let:

$$[\text{Cl}^-] = [\text{NaCl}] + x$$

$$[\text{HCl}] = [\text{HCl}]_{dry} - x$$

$$[\text{NO}_3^-] = [\text{NaNO}_3] + y$$

$$[\text{HNO}_3] = [\text{HNO}_3]_{dry} - y$$

Using  $[\text{H}^+] = \frac{K_{\text{HCl}}([\text{HCl}]_{dry} - x)}{[\text{NaCl}] + x}$  and the expressions for  $[\text{Cl}^-]$ ,  $[\text{HCl}]$ ,  $[\text{NO}_3^-]$  and  $[\text{HNO}_3]$  in ER5

and solving for  $y$  gives

$$y = \frac{[\text{HNO}_3]_{dry}([\text{NaCl}] + x) - \frac{K_{\text{HCl}}}{K_{\text{HNO}_3}}([\text{HCl}]_{dry} - x)[\text{NaNO}_3]}{([\text{NaCl}] + x) + \frac{K_{\text{HCl}}}{K_{\text{HNO}_3}}([\text{HCl}]_{dry} - x)}$$

Let

$$[\text{NH}_4^+] = \Delta c$$

$$[\text{NH}_3] = [\text{NH}_3]_{dry} - \Delta c$$

Using the expressions for  $[\text{NH}_4^+]$  and  $[\text{NH}_3]$  in (3), solving for  $[\text{H}^+]$ , and substituting the result for  $[\text{H}^+]$  into ER2-ER4 gives a quadratic equation for  $\Delta c$ :

$$\text{Let } b = -\left([\text{NH}_3]_{dry} + x + y + \frac{1}{\frac{K_{\text{NH}_3}}{K_{\text{H}_2\text{O}}}}\right) \text{ and } c = [\text{NH}_3]_{dry}(x + y)$$

The solution is the *negative* root using the quadratic formula:

$$\Delta c = \frac{-b - \sqrt{b^2 - 4c}}{2}$$

$[\text{H}^+]$  is then calculated the same as G5, except now (3) includes  $[\text{Mg}^{2+}]$  and  $[\text{K}^+]$  (note  $[\text{Ca}^{2+}] = 0$  and  $[\text{HSO}_4^-] = 0$ ).

|            |                                                                                                                                                                                                                                                                                                                                                                                                                                                                                                                                                                                                                                                                                                                                                                                                                                                                                                                                                                                                                                                                                                                                                                                                                                                                                                                                                                                                            |                                            |
|------------|------------------------------------------------------------------------------------------------------------------------------------------------------------------------------------------------------------------------------------------------------------------------------------------------------------------------------------------------------------------------------------------------------------------------------------------------------------------------------------------------------------------------------------------------------------------------------------------------------------------------------------------------------------------------------------------------------------------------------------------------------------------------------------------------------------------------------------------------------------------------------------------------------------------------------------------------------------------------------------------------------------------------------------------------------------------------------------------------------------------------------------------------------------------------------------------------------------------------------------------------------------------------------------------------------------------------------------------------------------------------------------------------------------|--------------------------------------------|
|            | $[H^+]^* = 2[SO_4^{2-}] + [NO_3^-] + [Cl^-] - [Na^+] - [NH_4^+] - 2[Mg^{2+}] - [K^+]$ <p>The objective function (ER6) is evaluated using the ion and gas concentrations determined above, and its sign (i.e., positive or negative) is then used to initialize the next iteration of the ITP procedure:</p> $\frac{[Cl^-][H^+]}{K_{HCl}[HCl]} - 1 = 0$                                                                                                                                                                                                                                                                                                                                                                                                                                                                                                                                                                                                                                                                                                                                                                                                                                                                                                                                                                                                                                                     |                                            |
| <b>P13</b> | <p><u>Begin with dry salt partitioning to obtain:</u></p> $[CaSO_4] = \min(TCa, TS)$ $[SO_4]_{free} = TS - [CaSO_4]$ $[Ca]_{free} = TCa - [CaSO_4]$ $[K_2SO_4] = \min\left(\frac{1}{2}TK, [SO_4]_{free}\right)$ $[SO_4]_{free} = [SO_4]_{free} - [K_2SO_4]$ $[K]_{free} = TK - 2[K_2SO_4]$ $[MgSO_4] = \min([SO_4]_{free}, TMg)$ $[SO_4]_{free} = [SO_4]_{free} - [MgSO_4]$ $[Mg]_{free} = TMg - [MgSO_4]$ $[NaCl] = \min(TNa, TCl)$ $[Na]_{free} = TNa - [NaCl]$ $[Cl]_{free} = TCl - [NaCl]$ $[Ca(NO_3)_2] = \min\left([Ca]_{free}, \frac{1}{2}TN\right)$ $[Ca]_{free} = [Ca]_{free} - [Ca(NO_3)_2]$ $[NO_3]_{free} = TN - 2[Ca(NO_3)_2]$ $[CaCl_2] = \min\left([Ca]_{free}, \frac{1}{2}[Cl]_{free}\right)$ $[Ca]_{free} = [Ca]_{free} - [CaCl_2]$ $[Cl]_{free} = [Cl]_{free} - 2[CaCl_2]$ $[Mg(NO_3)_2] = \min\left([Mg]_{free}, \frac{1}{2}[NO_3]_{free}\right)$ $[Mg]_{free} = [Mg]_{free} - [Mg(NO_3)_2]$ $[NO_3]_{free} = [NO_3]_{free} - 2[Mg(NO_3)_2]$ $[MgCl_2] = \min\left([Mg]_{free}, \frac{1}{2}[Cl]_{free}\right)$ $[Mg]_{free} = [Mg]_{free} - [MgCl_2]$ $[Cl]_{free} = [Cl]_{free} - 2[MgCl_2]$ $[NaNO_3] = \min([Na]_{free}, [NO_3]_{free})$ $[Na]_{free} = [Na]_{free} - [NaNO_3]$ $[NO_3]_{free} = [NO_3]_{free} - [NaNO_3]$ $[KCl] = \min([K]_{free}, [Cl]_{free})$ $[K]_{free} = [K]_{free} - [KCl]$ $[Cl]_{free} = [Cl]_{free} - [KCl]$ $[KNO_3] = \min([K]_{free}, [NO_3]_{free})$ | <p>The minor system is the same as D3.</p> |



$$[K]_{free} = [K]_{free} - [KNO_3]$$

$$[NO_3]_{free} = [NO_3]_{free} - [KNO_3]$$

$$[NH_3]_{dry} = TA$$

$$[HNO_3]_{dry} = [NO_3]_{free}$$

$$[HCl]_{dry} = [Cl]_{free}$$

The set of initial equations are:

(1) ER2–ER6

(2) Mass balance for TS, TA, TN, TCl, TNa, TCa, TMg, TK

$$TS = [CaSO_4] + [K_2SO_4] + [MgSO_4] + [SO_4]_{free}$$

$$TA = [NH_3]_{dry}$$

$$TN = [HNO_3]_{dry} + [KNO_3] + [NaNO_3] + 2[Mg(NO_3)_2] + 2[Ca(NO_3)_2]$$

$$TCl = [HCl]_{dry} + [NaCl] + 2[CaCl_2] + 2[MgCl_2] + [KCl]$$

$$TNa = [NaNO_3] + [NaCl]$$

$$TMg = [MgSO_4] + [MgCl_2] + [Mg(NO_3)_2] + [Mg]_{free}$$

$$TK = 2[K_2SO_4] + [KNO_3] + [KCl] + [K]_{free}$$

$$TCa = [CaSO_4] + [Ca(NO_3)_2] + [CaCl_2] + [Ca]_{free}$$

(3) Electroneutrality

$$[NH_4^+] + [H^+] + [Na^+] + 2[Mg^{2+}] + [K^+] + 2[Ca^{2+}]$$

$$= 2[SO_4^{2-}] + [HSO_4^-] + [Cl^-] + [NO_3^-] + [OH^-]$$

Solution:

The initial step is to perform a root bracketing search for the variable  $x$  (representing a change in  $[HCl]_{dry}$ ) within the range  $[tiny, [HCl]_{dry} - tiny]$  to identify an interval where the 'objective function' contains a sign change (i.e., root), followed by an ITP search to refine  $x$  within the identified interval, if applicable.

All solids (except  $CaSO_4$ ) are assumed to undergo deliquescence. System of equations:

The concentrations of  $[Na^+]$ ,  $[SO_4^{2-}]$ ,  $[Mg^{2+}]$ ,  $[K^+]$  and  $[Ca^{2+}]$  remain constant during the iterative procedure of the major system.

$$[SO_4^{2-}] = [K_2SO_4] + [MgSO_4]$$

$$[HSO_4^-] = 0$$

$$[Na^+] = [NaNO_3] + [NaCl]$$

$$[Mg^{2+}] = [MgSO_4] + [MgCl_2] + [Mg(NO_3)_2]$$

$$[K^+] = 2[K_2SO_4] + [KNO_3] + [KCl]$$

$$[Ca^{2+}] = [Ca(NO_3)_2] + [CaCl_2]$$

Let

$$P = [NaCl] + 2[CaCl_2] + 2[MgCl_2] + [KCl]$$

$$[Cl^-] = P + x$$

$$[HCl] = [HCl]_{dry} - x$$

$$Q = [KNO_3] + [NaNO_3] + 2[Mg(NO_3)_2] + 2[Ca(NO_3)_2]$$

$$[NO_3^-] = Q + y$$

|                  |                                                                                                                                                                                                                                                                                                                                                                                                                                                                                                                                                                                                                                                                                                                                                                                                                                                                                                                                                                                                                                                                                                                                                                                                                                                                                                                                                                                                                                                                                                                                                                                                                                                                                                                                                                                                                                                                                                           |                                                                                                                                                                                                                                                                     |
|------------------|-----------------------------------------------------------------------------------------------------------------------------------------------------------------------------------------------------------------------------------------------------------------------------------------------------------------------------------------------------------------------------------------------------------------------------------------------------------------------------------------------------------------------------------------------------------------------------------------------------------------------------------------------------------------------------------------------------------------------------------------------------------------------------------------------------------------------------------------------------------------------------------------------------------------------------------------------------------------------------------------------------------------------------------------------------------------------------------------------------------------------------------------------------------------------------------------------------------------------------------------------------------------------------------------------------------------------------------------------------------------------------------------------------------------------------------------------------------------------------------------------------------------------------------------------------------------------------------------------------------------------------------------------------------------------------------------------------------------------------------------------------------------------------------------------------------------------------------------------------------------------------------------------------------|---------------------------------------------------------------------------------------------------------------------------------------------------------------------------------------------------------------------------------------------------------------------|
|                  | <p><math>[\text{HNO}_3] = [\text{HNO}_3]_{dry} - y</math></p> <p>Using <math>[\text{H}^+] = \frac{K_{\text{HCl}}([\text{HCl}]_{dry} - x)}{P + x}</math> and the expressions for <math>[\text{Cl}^-]</math>, <math>[\text{HCl}]</math>, <math>[\text{NO}_3^-]</math> and <math>[\text{HNO}_3]</math> in ER5 and solving for <math>y</math> gives</p> $y = \frac{[\text{HNO}_3]_{dry}(P + x) - \frac{K_{\text{HCl}}}{K_{\text{HNO}_3}}([\text{HCl}]_{dry} - x)Q}{(P + x) + \frac{K_{\text{HCl}}}{K_{\text{HNO}_3}}([\text{HCl}]_{dry} - x)}$ <p>Let</p> $[\text{NH}_4^+] = \Delta c$ $[\text{NH}_3] = [\text{NH}_3]_{dry} - \Delta c$ <p>Using the expressions for <math>[\text{NH}_4^+]</math> and <math>[\text{NH}_3]</math> in (3), solving for <math>[\text{H}^+]</math>, and substituting the result for <math>[\text{H}^+]</math> into ER2-ER4 gives a quadratic equation for <math>\Delta c</math>:</p> <p>Let <math>b = -\left([\text{NH}_3]_{dry} + x + y + \frac{1}{K_{\text{NH}_3}}\right)</math> and <math>c = [\text{NH}_3]_{dry}(x + y)</math></p> <p>The solution is the <i>negative</i> root using the quadratic formula:</p> $\Delta c = [\text{NH}_4^+] = \frac{-b - \sqrt{b^2 - 4c}}{2}$ <p><math>[\text{H}^+]</math> is then calculated the same as G5, except now (3) includes <math>[\text{Mg}^{2+}]</math>, <math>[\text{K}^+]</math> and <math>[\text{Ca}^{2+}]</math> (note <math>[\text{HSO}_4^-] = 0</math>).</p> $[\text{H}^+]^* = 2[\text{SO}_4^{2-}] + [\text{NO}_3^-] + [\text{Cl}^-] - [\text{Na}^+] - [\text{NH}_4^+] - 2[\text{Mg}^{2+}] - [\text{K}^+] - 2[\text{Ca}^{2+}]$ <p>The objective function (ER6) is evaluated using the ion and gas concentrations determined above, and its sign (i.e., positive or negative) is then used to initialize the next iteration of the ITP procedure:</p> $\frac{[\text{Cl}^-][\text{H}^+]}{K_{\text{HCl}}[\text{HCl}]} - 1 = 0$ |                                                                                                                                                                                                                                                                     |
| <p><b>L9</b></p> | <p><u>Begin with dry salt partitioning to obtain:</u></p> $[\text{CaSO}_4] = \min(\text{TCa}, \text{TS})$ $[\text{SO}_4]_{free} = \text{TS} - [\text{CaSO}_4]$ $[\text{Ca}]_{free} = \text{TCa} - [\text{CaSO}_4]$ $[\text{K}_2\text{SO}_4] = \min\left(\frac{1}{2}\text{TK}, [\text{SO}_4]_{free}\right)$ $[\text{SO}_4]_{free} = [\text{SO}_4]_{free} - [\text{K}_2\text{SO}_4]$ $[\text{K}]_{free} = \text{TK} - 2[\text{K}_2\text{SO}_4]$ $[\text{Na}_2\text{SO}_4] = \min\left(\frac{1}{2}\text{TNa}, [\text{SO}_4]_{free}\right)$ $[\text{SO}_4]_{free} = [\text{SO}_4]_{free} - [\text{Na}_2\text{SO}_4]$ $[\text{Na}]_{free} = \text{TNa} - 2[\text{Na}_2\text{SO}_4]$ $[\text{MgSO}_4] = \min(\text{TMg}, [\text{SO}_4]_{free})$                                                                                                                                                                                                                                                                                                                                                                                                                                                                                                                                                                                                                                                                                                                                                                                                                                                                                                                                                                                                                                                                                                                                                                 | <p>Same as case I6.</p> <p>Any <math>[\text{NH}_4]_{free}</math> in the major system is added to <math>[\text{NH}_3]_{minor}</math> after solving the minor system:</p> $[\text{NH}_3]_f = [\text{NH}_3]_{minor} + [\text{NH}_4]_{free}$ $[\text{NH}_4]_{free} = 0$ |

$$[\text{Mg}]_{free} = \text{TMg} - [\text{MgSO}_4]$$

$$[\text{SO}_4]_{free} = [\text{SO}_4]_{free} - [\text{MgSO}_4]$$

$$[(\text{NH}_4)_3\text{H}(\text{SO}_4)_2] = \min\left(\frac{1}{3}\text{TA}, \frac{1}{2}[\text{SO}_4]_{free}\right)$$

$$[\text{SO}_4]_{free} = [\text{SO}_4]_{free} - 2[(\text{NH}_4)_3\text{H}(\text{SO}_4)_2]$$

$$[\text{NH}_4]_{free} = \text{TA} - 3[(\text{NH}_4)_3\text{H}(\text{SO}_4)_2]$$

Based on the above partitioning, there are two cases:

Case 1:  $[\text{SO}_4]_{free} \leq \text{tiny}$

$$[\text{SO}_4]_{free} = [\text{SO}_4]_{free} + 2[(\text{NH}_4)_3\text{H}(\text{SO}_4)_2] - 2([( \text{NH}_4)_3\text{H}(\text{SO}_4)_2] - [\text{NH}_4]_{free})$$

$$[\text{NH}_4]_{free_2} = [\text{NH}_4]_{free} + 3[(\text{NH}_4)_3\text{H}(\text{SO}_4)_2] - 3([( \text{NH}_4)_3\text{H}(\text{SO}_4)_2] - [\text{NH}_4]_{free})$$

$$[(\text{NH}_4)_3\text{H}(\text{SO}_4)_2] = [(\text{NH}_4)_3\text{H}(\text{SO}_4)_2] - [\text{NH}_4]_{free}$$

$$[(\text{NH}_4)_2\text{SO}_4] = \min(0.5[\text{NH}_4]_{free_2}, [\text{SO}_4]_{free})$$

$$[\text{NH}_4]_{free} = [\text{NH}_4]_{free_2} - 2[(\text{NH}_4)_2\text{SO}_4]$$

$$[\text{SO}_4]_{free} = [\text{SO}_4]_{free} - [(\text{NH}_4)_2\text{SO}_4]$$

Case 2 (only if Case 1 = false):  $[\text{NH}_4]_{free} \leq \text{tiny}$

$$[\text{NH}_4\text{HSO}_4] = 3 \min([( \text{NH}_4)_3\text{H}(\text{SO}_4)_2], [\text{SO}_4]_{free})$$

$$[(\text{NH}_4)_3\text{H}(\text{SO}_4)_2] = [(\text{NH}_4)_3\text{H}(\text{SO}_4)_2] - [\text{SO}_4]_{free}$$

$$[\text{SO}_4]_{free} = [\text{SO}_4]_{free} - \frac{1}{3}[\text{NH}_4\text{HSO}_4]$$

A.  $[\text{Na}_2\text{SO}_4] > \text{tiny}$

$$[\text{SO}_4]_{free_2} = [\text{SO}_4]_{free}$$

$$[\text{SO}_4]_{free} = [\text{SO}_4]_{free} + [\text{Na}_2\text{SO}_4] - (\max([\text{Na}_2\text{SO}_4] - [\text{SO}_4]_{free}, 0))$$

$$[\text{Na}_2\text{SO}_4] = [\text{Na}_2\text{SO}_4] - [\text{SO}_4]_{free_2}$$

$$[\text{Na}]_{free} = \text{TNa} - 2[\text{Na}_2\text{SO}_4]$$

$$[\text{NaHSO}_4] = \min([\text{Na}]_{free}, [\text{SO}_4]_{free})$$

$$[\text{SO}_4]_{free} = [\text{SO}_4]_{free} - [\text{NaHSO}_4]$$

$$[\text{Na}]_{free} = [\text{Na}]_{free} - [\text{NaHSO}_4]$$

B.  $[\text{K}_2\text{SO}_4] > \text{tiny}$

$$[\text{SO}_4]_{free_2} = [\text{SO}_4]_{free}$$

$$[\text{SO}_4]_{free} = [\text{SO}_4]_{free} + [\text{K}_2\text{SO}_4] - (\max([\text{K}_2\text{SO}_4] - [\text{SO}_4]_{free}, 0))$$

$$[\text{K}_2\text{SO}_4] = [\text{K}_2\text{SO}_4] - [\text{SO}_4]_{free_2}$$

$$[\text{K}]_{free} = \text{TK} - 2[\text{K}_2\text{SO}_4]$$

$$[\text{KHSO}_4] = \min([\text{K}]_{free}, [\text{SO}_4]_{free})$$

$$[\text{SO}_4]_{free} = [\text{SO}_4]_{free} - [\text{KHSO}_4]$$

$$[\text{K}]_{free} = [\text{K}]_{free} - [\text{KHSO}_4]$$

After the above partitioning, the gaseous species are:

$$[\text{NH}_3]_{dry} = 0$$

|           |                                                                                                                                                                                                                                                                                                                                                                                                                                                                                                                                                                                                                                                                                                                                                                                                                                                                                                                                                                                                                                                                                                                                                                                                                                                                                                                                                                                                                                                                                                                                                                                                                                                                                                                                                                                                                                                                                                                                                                                                                                                                                                                                                                                                                                                                                                                                                                                                                                                                                                                                                                                                                                                                                                                                                                                                                                                                                                                                                                                                                                                                                             |                  |
|-----------|---------------------------------------------------------------------------------------------------------------------------------------------------------------------------------------------------------------------------------------------------------------------------------------------------------------------------------------------------------------------------------------------------------------------------------------------------------------------------------------------------------------------------------------------------------------------------------------------------------------------------------------------------------------------------------------------------------------------------------------------------------------------------------------------------------------------------------------------------------------------------------------------------------------------------------------------------------------------------------------------------------------------------------------------------------------------------------------------------------------------------------------------------------------------------------------------------------------------------------------------------------------------------------------------------------------------------------------------------------------------------------------------------------------------------------------------------------------------------------------------------------------------------------------------------------------------------------------------------------------------------------------------------------------------------------------------------------------------------------------------------------------------------------------------------------------------------------------------------------------------------------------------------------------------------------------------------------------------------------------------------------------------------------------------------------------------------------------------------------------------------------------------------------------------------------------------------------------------------------------------------------------------------------------------------------------------------------------------------------------------------------------------------------------------------------------------------------------------------------------------------------------------------------------------------------------------------------------------------------------------------------------------------------------------------------------------------------------------------------------------------------------------------------------------------------------------------------------------------------------------------------------------------------------------------------------------------------------------------------------------------------------------------------------------------------------------------------------------|------------------|
|           | <p><math>[\text{HNO}_3]_{dry} = \text{TN}</math><br/> <math>[\text{HCl}]_{dry} = \text{TCl}</math></p> <p><u>All solids (except <math>\text{CaSO}_4</math>) are assumed to undergo deliquescence. System of equations:</u></p> <p>(1) ERI<br/> (2) Mass balance for TS, TA, TN, TCl, TNa, TCa, TMg, TK<br/> <math>\text{TS} = 2[(\text{NH}_4)_3\text{H}(\text{SO}_4)_2] + [\text{Na}_2\text{SO}_4] + [\text{NH}_4\text{HSO}_4] + [(\text{NH}_4)_2\text{SO}_4] + [\text{NaHSO}_4] + [\text{CaSO}_4]</math><br/> <math>\quad + [\text{KHSO}_4] + [\text{K}_2\text{SO}_4] + [\text{MgSO}_4] + [\text{SO}_4]_{free}</math><br/> <math>\text{TA} = 3[(\text{NH}_4)_3\text{H}(\text{SO}_4)_2] + 2[(\text{NH}_4)_2\text{SO}_4] + [\text{NH}_4\text{HSO}_4] + [\text{NH}_4]_{free}</math><br/> <math>\text{TN} = [\text{HNO}_3]_{dry}</math><br/> <math>\text{TCl} = [\text{HCl}]_{dry}</math><br/> <math>\text{TNa} = 2[\text{Na}_2\text{SO}_4] + [\text{NaHSO}_4] + [\text{Na}]_{free}</math><br/> <math>\text{TMg} = [\text{MgSO}_4] + [\text{Mg}]_{free}</math><br/> <math>\text{TCa} = [\text{CaSO}_4] + [\text{Ca}]_{free}</math><br/> <math>\text{TK} = [\text{KHSO}_4] + 2[\text{K}_2\text{SO}_4] + [\text{K}]_{free}</math></p> <p><u>All solids (except <math>\text{CaSO}_4</math>) are assumed to undergo deliquescence. System of equations:</u></p> <p>The concentrations of <math>[\text{Na}^+]</math>, <math>[\text{NH}_4^+]</math>, <math>[\text{Mg}^{2+}]</math> and <math>[\text{K}^+]</math> remain constant during the iterative procedure of the major system.</p> $[\text{Na}^+] = 2[\text{Na}_2\text{SO}_4] + [\text{NaHSO}_4]$<br>$[\text{NH}_4^+] = 3[(\text{NH}_4)_3\text{H}(\text{SO}_4)_2] + 2[(\text{NH}_4)_2\text{SO}_4] + [\text{NH}_4\text{HSO}_4]$<br>$[\text{Mg}^{2+}] = [\text{MgSO}_4]$<br>$[\text{K}^+] = [\text{KHSO}_4] + 2[\text{K}_2\text{SO}_4]$<br>$[\text{Ca}^{2+}] = 0$<br>$[\text{Cl}^-] = 0$<br>$[\text{NO}_3^-] = 0$ <p>Let<br/> <math>[\text{SO}_4^{2-}] = [(\text{NH}_4)_3\text{H}(\text{SO}_4)_2] + [\text{Na}_2\text{SO}_4] + [(\text{NH}_4)_2\text{SO}_4] + [\text{K}_2\text{SO}_4] + [\text{MgSO}_4] + \Delta c</math><br/> <math>[\text{HSO}_4^-] = [(\text{NH}_4)_3\text{H}(\text{SO}_4)_2] + [\text{NH}_4\text{HSO}_4] + [\text{NaHSO}_4] + [\text{KHSO}_4] - \Delta c</math><br/> <math>[\text{H}^+] = \Delta c</math></p> <p>Using the expressions for <math>[\text{SO}_4^{2-}]</math>, <math>[\text{HSO}_4^-]</math> and <math>[\text{H}^+]</math> in (1) gives a quadratic equation in terms of <math>\Delta c</math>.<br/> Let <math>b = [(\text{NH}_4)_3\text{H}(\text{SO}_4)_2] + [\text{Na}_2\text{SO}_4] + [(\text{NH}_4)_2\text{SO}_4] + [\text{K}_2\text{SO}_4] + [\text{MgSO}_4] + K_{\text{HSO}_4}</math><br/> and <math>c = -K_{\text{HSO}_4}([(\text{NH}_4)_3\text{H}(\text{SO}_4)_2] + [\text{NH}_4\text{HSO}_4] + [\text{NaHSO}_4] + [\text{KHSO}_4])</math></p> <p>The solution is the <i>positive</i> root using the quadratic formula:<br/> <math display="block">\Delta c = \frac{-b + \sqrt{b^2 - 4c}}{2}</math></p> |                  |
| <b>K4</b> | <p><u>Begin with dry salt partitioning to obtain:</u></p> $[\text{NH}_4\text{HSO}_4] = \text{TA}$<br>$[\text{NaHSO}_4] = \text{TNa}$                                                                                                                                                                                                                                                                                                                                                                                                                                                                                                                                                                                                                                                                                                                                                                                                                                                                                                                                                                                                                                                                                                                                                                                                                                                                                                                                                                                                                                                                                                                                                                                                                                                                                                                                                                                                                                                                                                                                                                                                                                                                                                                                                                                                                                                                                                                                                                                                                                                                                                                                                                                                                                                                                                                                                                                                                                                                                                                                                        | Same as case I6. |

$$[\text{KHSO}_4] = \text{TK}$$

$$[\text{MgSO}_4] = \text{TMg}$$

$$[\text{CaSO}_4] = \text{TCa}$$

$$[\text{SO}_4]_{\text{free}} = \text{TS} - [\text{NH}_4\text{HSO}_4] + [\text{NaHSO}_4] + [\text{KHSO}_4] + [\text{MgSO}_4] + [\text{CaSO}_4]$$

The set of initial equations are:

(1) ER1

(2) Mass balance for TS, TA, TN, TCl, TNa, TCa, TMg, TK

$$\text{TA} = [\text{NH}_4\text{HSO}_4]$$

$$\text{TNa} = [\text{NaHSO}_4]$$

$$\text{TK} = [\text{KHSO}_4]$$

$$\text{TMg} = [\text{MgSO}_4]$$

$$\text{TCa} = [\text{CaSO}_4]$$

$$\text{TCl} = [\text{HCl}_{\text{dry}}]$$

$$\text{TN} = [\text{NO}_3_{\text{dry}}]$$

$$\text{TS} = [\text{NH}_4\text{HSO}_4] + [\text{NaHSO}_4] + [\text{KHSO}_4] + [\text{MgSO}_4] + [\text{CaSO}_4] + [\text{SO}_4]_{\text{free}}$$

(3) Electroneutrality

$$[\text{NH}_4^+] + [\text{H}^+] + [\text{Na}^+] + 2[\text{Mg}^{2+}] + [\text{K}^+] + 2[\text{Ca}^{2+}] = 2[\text{SO}_4^{2-}] + [\text{HSO}_4^-] + [\text{Cl}^-] + [\text{NO}_3^-]$$

All solids (except  $\text{CaSO}_4$ ) are assumed to undergo deliquescence. System of equations:

$$[\text{Mg}^{2+}] = [\text{MgSO}_4]$$

$$[\text{K}^+] = [\text{KHSO}_4]$$

$$[\text{Na}^+] = [\text{NaHSO}_4]$$

$$[\text{NH}_4^+] = [\text{NH}_4\text{HSO}_4]$$

$$[\text{Ca}^{2+}] = 0$$

$$[\text{Cl}^-] = 0$$

$$[\text{NO}_3^-] = 0$$

Let:

$$[\text{HSO}_4^-] = [\text{SO}_4]_{\text{free}} + [\text{KHSO}_4] + [\text{NH}_4\text{HSO}_4] + [\text{NaHSO}_4] - x$$

$$[\text{SO}_4^{2-}] = [\text{MgSO}_4] + x$$

$$[\text{H}^+] = [\text{SO}_4]_{\text{free}} + x$$

Substituting the resulting expressions for  $[\text{HSO}_4^-]$ ,  $[\text{SO}_4^{2-}]$  and  $[\text{H}^+]$  into (1) gives a quadratic equation in terms of  $x$ .

Let  $b = K_{\text{HSO}_4} + [\text{SO}_4]_{\text{free}} + [\text{MgSO}_4]$  and

$$c = -K_{\text{HSO}_4}([\text{SO}_4]_{\text{free}} + [\text{KHSO}_4] + [\text{NH}_4\text{HSO}_4] + [\text{NaHSO}_4]) + [\text{SO}_4]_{\text{free}}[\text{MgSO}_4]$$

The solution is the *positive* root using the quadratic formula:

$$x = \frac{-b + \sqrt{b^2 - 4c}}{2}$$

**Table S3: The analytic solution of the quadratic formula used in HETP, as given by Press et al. (2007).**

|                                                                                                                                                                                                                                                                                                                                                                                                                                                                                                                                                                                                                                                                                                                                                                                                                                                                                                                                                                                                                                                                                                                                                                                                                             |                                                                                                                                                                                                                                                                                                                                                                                                                                                                                                                                                                                                                                                                                                                                                                                                                                                                                                                                                                                                                                                                                                                                                                                                                                                                                                                                        |
|-----------------------------------------------------------------------------------------------------------------------------------------------------------------------------------------------------------------------------------------------------------------------------------------------------------------------------------------------------------------------------------------------------------------------------------------------------------------------------------------------------------------------------------------------------------------------------------------------------------------------------------------------------------------------------------------------------------------------------------------------------------------------------------------------------------------------------------------------------------------------------------------------------------------------------------------------------------------------------------------------------------------------------------------------------------------------------------------------------------------------------------------------------------------------------------------------------------------------------|----------------------------------------------------------------------------------------------------------------------------------------------------------------------------------------------------------------------------------------------------------------------------------------------------------------------------------------------------------------------------------------------------------------------------------------------------------------------------------------------------------------------------------------------------------------------------------------------------------------------------------------------------------------------------------------------------------------------------------------------------------------------------------------------------------------------------------------------------------------------------------------------------------------------------------------------------------------------------------------------------------------------------------------------------------------------------------------------------------------------------------------------------------------------------------------------------------------------------------------------------------------------------------------------------------------------------------------|
| <p>Assume a quadratic equation of the form <math>ax^2 + bx + c = 0</math>. In ISORROPIA II the quadratic equation is solved using the unmodified quadratic formula, with two possible roots</p> $x_a = \frac{-b + \sqrt{b^2 - 4ac}}{2a}, \quad (1)$ <p>and</p> $x_b = \frac{-b - \sqrt{b^2 - 4ac}}{2a}. \quad (2)$ <p>Press et al. (2007) gives an analytic formula to solve the quadratic equation that avoids the catastrophic cancellation experienced in (1) and (2),</p> $q = -\frac{1}{2}(b + \text{sign}(b)\sqrt{b^2 - 4ac}) \text{ with } x_1 = \frac{c}{q} \text{ and } x_2 = \frac{q}{a}. \quad (3)$ <p>Expanding <math>x_1</math></p> $x_1 = \frac{c}{q} = \frac{-2c}{b + \text{sign}(b)\sqrt{b^2 - 4ac}}$ <p>and rationalizing the denominator gives*</p> $x_1 = \frac{-2c}{b + \text{sign}(b)\sqrt{b^2 - 4ac}} \times \frac{b - \text{sign}(b)\sqrt{b^2 - 4ac}}{b - \text{sign}(b)\sqrt{b^2 - 4ac}} = \frac{-b + \text{sign}(b)\sqrt{b^2 - 4ac}}{2a}. \quad (4)$ <p>*<b>(4) is not used in the HETP code. In the HETP code, <math>x_1 = c/q</math>, as given in (3).</b></p> <p>Likewise, expanding <math>x_2</math> gives</p> $x_2 = \frac{q}{a} = \frac{-b - \text{sign}(b)\sqrt{b^2 - 4ac}}{2a}. \quad (5)$ | <p>In HETP we have updated the code so that it no longer uses (1) and (2) to solve the quadratic equation. Instead HETP uses (3), with two possible cases as shown below:</p> <p><b>Case 1: The solution is (1).</b></p> <pre> if ( b &gt; 0 ) then   x = x1 = c/q = <math>\frac{-b + \text{sign}(b)\sqrt{b^2 - 4ac}}{2a} \equiv \frac{-b + \sqrt{b^2 - 4ac}}{2a}</math> elseif ( b &lt; 0 ) then   x = x2 = <math>\frac{q}{a} = \frac{-b - \text{sign}(b)\sqrt{b^2 - 4ac}}{2a} \equiv \frac{-b + \sqrt{b^2 - 4ac}}{2a}</math> elseif ( b = 0 ) then   x = <math>\frac{\sqrt{-4ac}}{2a}</math> if <math>ac &lt; 0</math>, otherwise undefined end if </pre> <p><b>Case 2: The solution is (2).</b></p> <pre> if ( b &lt; 0 ) then   x = x1 = <math>\frac{c}{q} = \frac{-b + \text{sign}(b)\sqrt{b^2 - 4ac}}{2a} \equiv \frac{-b - \sqrt{b^2 - 4ac}}{2a}</math> elseif ( b &gt; 0 ) then   x = x2 = <math>\frac{q}{a} = \frac{-b - \text{sign}(b)\sqrt{b^2 - 4ac}}{2a} \equiv \frac{-b - \sqrt{b^2 - 4ac}}{2a}</math> elseif ( b = 0 ) then   x = <math>\frac{-\sqrt{-4ac}}{2a}</math> if <math>ac &gt; 0</math>, otherwise undefined end if </pre> <p>In some instances, the sign of <math>b</math> is known at compile time (i.e., <math>b</math> always <math>&gt; 0</math>), eliminating the need for a branching if statement.</p> |
|-----------------------------------------------------------------------------------------------------------------------------------------------------------------------------------------------------------------------------------------------------------------------------------------------------------------------------------------------------------------------------------------------------------------------------------------------------------------------------------------------------------------------------------------------------------------------------------------------------------------------------------------------------------------------------------------------------------------------------------------------------------------------------------------------------------------------------------------------------------------------------------------------------------------------------------------------------------------------------------------------------------------------------------------------------------------------------------------------------------------------------------------------------------------------------------------------------------------------------|----------------------------------------------------------------------------------------------------------------------------------------------------------------------------------------------------------------------------------------------------------------------------------------------------------------------------------------------------------------------------------------------------------------------------------------------------------------------------------------------------------------------------------------------------------------------------------------------------------------------------------------------------------------------------------------------------------------------------------------------------------------------------------------------------------------------------------------------------------------------------------------------------------------------------------------------------------------------------------------------------------------------------------------------------------------------------------------------------------------------------------------------------------------------------------------------------------------------------------------------------------------------------------------------------------------------------------------|

30

35

40

**Table S4:** Statistics of  $\xi'$  for the summer data set containing 10,000 test cases. For the chemical subspace D3, G5, H6, O7, M8 and P13 only input conditions that require the application of bisection (ISORROPIA II) or ITP (HETP) to obtain an equilibrium solution are included. The **bolded** values denotes the smallest median error for that equilibrium constant (i.e., row) between HETP and ISORROPIA.

| Case | Equilibrium Constant                     | ISORROPIA: $\xi' =  \log(K_{\text{true}}/K_{\text{calc}}) $ |                        |                       |         | HETP: $\xi' =  \log(K_{\text{true}}/K_{\text{calc}}) $ |                        |                        |                        |
|------|------------------------------------------|-------------------------------------------------------------|------------------------|-----------------------|---------|--------------------------------------------------------|------------------------|------------------------|------------------------|
|      |                                          | Median                                                      | Q25                    | Q75                   | Maximum | Median                                                 | Q25                    | Q75                    | Maximum                |
| D3   | $K_{\text{NH}_3}/K_{\text{H}_2\text{O}}$ | <b>4.59</b> $\times 10^{-10}$                               | 1.73 $\times 10^{-10}$ | 8.13 $\times 10^{-9}$ | 22.6    | 5.62 $\times 10^{-10}$                                 | 1.88 $\times 10^{-10}$ | 4.27 $\times 10^{-9}$  | 36.6                   |
|      | $K_{\text{HNO}_3}$                       | <b>4.57</b> $\times 10^{-10}$                               | 1.74 $\times 10^{-10}$ | 8.07 $\times 10^{-9}$ | 30.7    | 5.62 $\times 10^{-10}$                                 | 1.88 $\times 10^{-10}$ | 4.27 $\times 10^{-9}$  | 49.2                   |
|      | $K_{\text{NH}_4\text{NO}_3}$             | <b>2.90</b>                                                 | 1.51                   | 5.39                  | 12.0    | 3.00                                                   | 1.54                   | 5.39                   | 62.4                   |
| E4   | $K_{\text{HSO}_4}$                       | 2.56 $\times 10^{-3}$                                       | 1.47 $\times 10^{-5}$  | 0.14                  | 47.2    | <b>8.88</b> $\times 10^{-16}$                          | 0.00                   | 9.02 $\times 10^{-13}$ | 24.7                   |
| F2   | $K_{\text{HSO}_4}$                       | 9.65 $\times 10^{-2}$                                       | 1.97 $\times 10^{-4}$  | 0.37                  | 1.27    | <b>0.00</b>                                            | 0.00                   | 4.44 $\times 10^{-16}$ | 1.33 $\times 10^{-15}$ |
| G5   | $K_{\text{NH}_3}/K_{\text{H}_2\text{O}}$ | 6.50 $\times 10^{-12}$                                      | 2.84 $\times 10^{-14}$ | 1.27 $\times 10^{-9}$ | 46.1    | <b>5.84</b> $\times 10^{-12}$                          | 2.84 $\times 10^{-14}$ | 2.89 $\times 10^{-10}$ | 30.6                   |
|      | $K_{\text{HNO}_3}$                       | <b>4.79</b> $\times 10^{-10}$                               | 1.90 $\times 10^{-10}$ | 3.08 $\times 10^{-4}$ | 54.0    | 5.01 $\times 10^{-10}$                                 | 1.83 $\times 10^{-11}$ | 2.30 $\times 10^{-7}$  | 29.9                   |
|      | $K_{\text{HCl}}$                         | 5.96 $\times 10^{-10}$                                      | 1.97 $\times 10^{-10}$ | 0.33                  | 31.8    | <b>5.02</b> $\times 10^{-10}$                          | 1.83 $\times 10^{-11}$ | 2.30 $\times 10^{-7}$  | 29.9                   |
| H6   | $K_{\text{NH}_3}/K_{\text{H}_2\text{O}}$ | 0.67                                                        | 2.83 $\times 10^{-2}$  | 5.16                  | 10.5    | 0.67                                                   | 2.83 $\times 10^{-2}$  | 5.18                   | 10.5                   |
|      | $K_{\text{HNO}_3}$                       | <b>13.4</b>                                                 | 6.72                   | 14.5                  | 18.9    | 31.8                                                   | 6.72                   | 32.9                   | 37.4                   |
|      | $K_{\text{HCl}}$                         | <b>0.56</b>                                                 | 2.81 $\times 10^{-2}$  | 5.15                  | 10.5    | 0.67                                                   | 2.83 $\times 10^{-2}$  | 5.18                   | 10.5                   |
| I6   | $K_{\text{HSO}_4}$                       | 0.10                                                        | 9.27 $\times 10^{-3}$  | 0.27                  | 32.6    | <b>0.00</b>                                            | 0.00                   | 1.71 $\times 10^{-13}$ | 6.57                   |
|      | $K_{\text{HNO}_3}$                       | 8.08                                                        | 3.48                   | 12.8                  | 42.5    | <b>3.81</b> $\times 10^{-10}$                          | 1.86 $\times 10^{-10}$ | 5.91 $\times 10^{10}$  | 44.1                   |
|      | $K_{\text{HCl}}$                         | 7.86                                                        | 3.66                   | 12.3                  | 37.5    | <b>3.81</b> $\times 10^{-10}$                          | 1.86 $\times 10^{-10}$ | 5.91 $\times 10^{10}$  | 42.5                   |
| J3   | $K_{\text{HSO}_4}$                       | 3.14 $\times 10^{-2}$                                       | 8.03 $\times 10^{-5}$  | 0.17                  | 0.51    | <b>0.00</b>                                            | 0.00                   | 0.00                   | 1.78 $\times 10^{-15}$ |
|      | $K_{\text{HNO}_3}$                       | 10.3                                                        | 6.34                   | 13.2                  | 29.3    | <b>4.83</b> $\times 10^{-10}$                          | 2.44 $\times 10^{-10}$ | 1.98 $\times 10^{-9}$  | 29.3                   |
|      | $K_{\text{HCl}}$                         | 10.3                                                        | 6.33                   | 13.2                  | 26.6    | <b>4.83</b> $\times 10^{-10}$                          | 2.44 $\times 10^{-10}$ | 1.98 $\times 10^{-10}$ | 29.3                   |
| O7   | $K_{\text{NH}_3}/K_{\text{H}_2\text{O}}$ | 3.76 $\times 10^{-11}$                                      | 7.32 $\times 10^{-13}$ | 9.84 $\times 10^{-2}$ | 46.1    | <b>2.53</b> $\times 10^{-11}$                          | 6.92 $\times 10^{-13}$ | 2.94 $\times 10^{-9}$  | 31.0                   |
|      | $K_{\text{HNO}_3}$                       | 1.34 $\times 10^{-8}$                                       | 3.98 $\times 10^{-10}$ | 0.28                  | 52.7    | <b>8.46</b> $\times 10^{-10}$                          | 2.35 $\times 10^{-10}$ | 3.18 $\times 10^{-4}$  | 22.4                   |
|      | $K_{\text{HCl}}$                         | 1.34 $\times 10^{-8}$                                       | 3.98 $\times 10^{-10}$ | 0.32                  | 48.7    | <b>8.46</b> $\times 10^{-10}$                          | 2.35 $\times 10^{-10}$ | 3.18 $\times 10^{-4}$  | 22.4                   |
| M8   | $K_{\text{NH}_3}/K_{\text{H}_2\text{O}}$ | <b>4.30</b> $\times 10^{-8}$                                | 1.25 $\times 10^{-9}$  | 5.19 $\times 10^{-3}$ | 10.2    | 4.31 $\times 10^{-8}$                                  | 1.24 $\times 10^{-9}$  | 5.19 $\times 10^{-3}$  | 10.2                   |
|      | $K_{\text{HNO}_3}$                       | <b>0.26</b>                                                 | 5.60 $\times 10^{-9}$  | 12.8                  | 27.0    | 0.28                                                   | 3.60 $\times 10^{-9}$  | 31.3                   | 45.4                   |
|      | $K_{\text{HCl}}$                         | 2.05 $\times 10^{-9}$                                       | 4.38 $\times 10^{-10}$ | 1.55 $\times 10^{-8}$ | 3.99    | <b>6.98</b> $\times 10^{-10}$                          | 1.30 $\times 10^{-10}$ | 1.48 $\times 10^{-8}$  | 1.32 $\times 10^{-2}$  |
| P13  | $K_{\text{NH}_3}/K_{\text{H}_2\text{O}}$ | <b>1.98</b> $\times 10^{-6}$                                | 2.27 $\times 10^{-8}$  | 1.38 $\times 10^{-4}$ | 3.82    | 2.38 $\times 10^{-6}$                                  | 2.42 $\times 10^{-8}$  | 1.98 $\times 10^{-4}$  | 13.5                   |
|      | $K_{\text{HNO}_3}$                       | 3.65                                                        | 1.04                   | 16.5                  | 23.5    | <b>3.61</b>                                            | 1.04                   | 34.9                   | 41.9                   |
|      | $K_{\text{HCl}}$                         | 3.01 $\times 10^{-10}$                                      | 1.43 $\times 10^{-10}$ | 1.29 $\times 10^{-9}$ | 11.2    | <b>8.30</b> $\times 10^{-11}$                          | 1.55 $\times 10^{-11}$ | 3.57 $\times 10^{-10}$ | 11.7                   |
| L9   | $K_{\text{HSO}_4}$                       | 2.33 $\times 10^{-3}$                                       | 9.93 $\times 10^{-6}$  | 9.74 $\times 10^{-2}$ | 62.2    | <b>8.84</b> $\times 10^{-14}$                          | 2.22 $\times 10^{-15}$ | 3.80 $\times 10^{-11}$ | 0.46                   |
|      | $K_{\text{HNO}_3}$                       | 14.7                                                        | 2.53                   | 16.9                  | 47.7    | <b>6.64</b> $\times 10^{-10}$                          | 3.19 $\times 10^{-10}$ | 1.42                   | 15.0                   |
|      | $K_{\text{HCl}}$                         | 14.7                                                        | 2.53                   | 16.9                  | 47.7    | <b>6.64</b> $\times 10^{-10}$                          | 3.19 $\times 10^{-10}$ | 1.42                   | 15.0                   |
| K4   | $K_{\text{HSO}_4}$                       | 2.02 $\times 10^{-2}$                                       | 1.83 $\times 10^{-4}$  | 0.11                  | 3.32    | <b>0.00</b>                                            | 0.00                   | 8.88 $\times 10^{-16}$ | 1.38 $\times 10^{-11}$ |
|      | $K_{\text{HNO}_3}$                       | 9.99                                                        | 4.47                   | 16.2                  | 45.3    | <b>5.00</b> $\times 10^{-10}$                          | 2.40 $\times 10^{-10}$ | 7.13 $\times 10^{-9}$  | 45.3                   |
|      | $K_{\text{HCl}}$                         | 9.98                                                        | 4.47                   | 16.1                  | 37.7    | <b>5.00</b> $\times 10^{-10}$                          | 2.40 $\times 10^{-10}$ | 7.13 $\times 10^{-9}$  | 45.3                   |

50 **Table S5:** Statistics of  $\xi'$  for the winter data set containing 10,000 test cases. For the chemical subspace D3, G5, H6, O7, M8 and P13 only input conditions that require the application of bisection (ISORROPIA II) or ITP (HETP) to obtain an equilibrium solution are included. The **bolded** values denotes the smallest median error for that equilibrium constant (i.e., row) between HETP and ISORROPIA.

| Case | Equilibrium Constant                     | ISORROPIA: $\xi' =  \log(K_{\text{true}}/K_{\text{calc}}) $ |                        |                       |                       | HETP: $\xi' =  \log(K_{\text{true}}/K_{\text{calc}}) $ |                        |                        |                        |
|------|------------------------------------------|-------------------------------------------------------------|------------------------|-----------------------|-----------------------|--------------------------------------------------------|------------------------|------------------------|------------------------|
|      |                                          | Median                                                      | Q25                    | Q75                   | Maximum               | Median                                                 | Q25                    | Q75                    | Maximum                |
| D3   | $K_{\text{NH}_3}/K_{\text{H}_2\text{O}}$ | $1.96 \times 10^{-9}$                                       | $3.41 \times 10^{-10}$ | 0.58                  | 22.7                  | <b><math>6.91 \times 10^{-10}</math></b>               | $1.46 \times 10^{-10}$ | $1.91 \times 10^{-5}$  | 5.95                   |
|      | $K_{\text{HNO}_3}$                       | $1.96 \times 10^{-9}$                                       | $3.41 \times 10^{-10}$ | $3.44 \times 10^{-5}$ | 23.7                  | <b><math>6.91 \times 10^{-10}</math></b>               | $1.46 \times 10^{-10}$ | $1.91 \times 10^{-5}$  | 5.95                   |
|      | $K_{\text{NH}_4\text{NO}_3}$             | 1.49                                                        | 1.13                   | 2.49                  | 10.5                  | 1.49                                                   | 1.13                   | 2.48                   | 10.5                   |
| E4   | $K_{\text{HSO}_4}$                       | $5.77 \times 10^{-2}$                                       | $5.76 \times 10^{-3}$  | 5.71                  | 46.9                  | <b><math>2.66 \times 10^{-15}</math></b>               | 0.00                   | $6.73 \times 10^{-7}$  | 26.2                   |
| F2   | $K_{\text{HSO}_4}$                       | $6.46 \times 10^{-2}$                                       | $2.67 \times 10^{-4}$  | 0.51                  | 3.50                  | <b>0.00</b>                                            | 0.00                   | $4.44 \times 10^{-16}$ | $1.78 \times 10^{-15}$ |
| G5   | $K_{\text{NH}_3}/K_{\text{H}_2\text{O}}$ | $2.27 \times 10^{-12}$                                      | $1.99 \times 10^{-13}$ | $7.35 \times 10^{-3}$ | 46.1                  | <b><math>1.21 \times 10^{-12}</math></b>               | $1.42 \times 10^{-13}$ | $9.05 \times 10^{-12}$ | 29.5                   |
|      | $K_{\text{HNO}_3}$                       | $5.59 \times 10^{-5}$                                       | $3.62 \times 10^{-10}$ | 3.81                  | 46.3                  | <b><math>4.60 \times 10^{-7}</math></b>                | $2.03 \times 10^{-10}$ | $6.93 \times 10^{-2}$  | 29.2                   |
|      | $K_{\text{HCl}}$                         | $7.27 \times 10^{-4}$                                       | $3.78 \times 10^{-10}$ | 4.35                  | 40.3                  | <b><math>4.60 \times 10^{-7}</math></b>                | $2.03 \times 10^{-10}$ | $6.93 \times 10^{-2}$  | 29.2                   |
| H6   | $K_{\text{NH}_3}/K_{\text{H}_2\text{O}}$ | 1.84                                                        | 0.16                   | 4.89                  | 9.69                  | 1.84                                                   | 0.16                   | 4.89                   | 9.69                   |
|      | $K_{\text{HNO}_3}$                       | <b>14.0</b>                                                 | 12.9                   | 14.7                  | 22.8                  | 32.5                                                   | 31.3                   | 33.1                   | 41.2                   |
|      | $K_{\text{HCl}}$                         | <b>1.83</b>                                                 | 0.16                   | 4.89                  | 9.69                  | 1.84                                                   | 0.16                   | 4.89                   | 9.69                   |
| I6   | $K_{\text{HSO}_4}$                       | $1.11 \times 10^{-3}$                                       | $2.24 \times 10^{-6}$  | 0.32                  | 46.7                  | <b><math>1.64 \times 10^{-14}</math></b>               | $8.88 \times 10^{-16}$ | $3.52 \times 10^{-11}$ | 10.7                   |
|      | $K_{\text{HNO}_3}$                       | 5.95                                                        | 2.39                   | 13.3                  | 46.3                  | <b><math>5.88 \times 10^{-10}</math></b>               | $2.97 \times 10^{-10}$ | $3.32 \times 10^{-4}$  | 46.3                   |
|      | $K_{\text{HCl}}$                         | 5.74                                                        | 2.27                   | 13.2                  | 38.3                  | <b><math>5.88 \times 10^{-10}</math></b>               | $2.97 \times 10^{-10}$ | $3.32 \times 10^{-4}$  | 46.3                   |
| J3   | $K_{\text{HSO}_4}$                       | $7.25 \times 10^{-2}$                                       | $4.25 \times 10^{-4}$  | 0.52                  | 3.50                  | <b>0.00</b>                                            | 0.00                   | $4.44 \times 10^{-16}$ | $2.22 \times 10^{-15}$ |
|      | $K_{\text{HNO}_3}$                       | 7.72                                                        | 3.53                   | 12.8                  | 32.2                  | <b><math>4.99 \times 10^{-10}</math></b>               | $2.52 \times 10^{-10}$ | $9.61 \times 10^{-9}$  | 32.2                   |
|      | $K_{\text{HCl}}$                         | 7.60                                                        | 3.50                   | 12.7                  | 32.2                  | <b><math>4.99 \times 10^{-10}</math></b>               | $2.52 \times 10^{-10}$ | $9.61 \times 10^{-9}$  | 32.2                   |
| O7   | $K_{\text{NH}_3}/K_{\text{H}_2\text{O}}$ | $5.03 \times 10^{-12}$                                      | $3.13 \times 10^{-13}$ | 0.16                  | 20.6                  | <b><math>1.51 \times 10^{-12}</math></b>               | $1.78 \times 10^{-13}$ | $3.24 \times 10^{-11}$ | 9.39                   |
|      | $K_{\text{HNO}_3}$                       | $6.39 \times 10^{-9}$                                       | $4.17 \times 10^{-10}$ | $7.27 \times 10^{-6}$ | 22.0                  | <b><math>7.07 \times 10^{-10}</math></b>               | $2.20 \times 10^{-10}$ | $8.08 \times 10^{-6}$  | 11.1                   |
|      | $K_{\text{HCl}}$                         | $1.05 \times 10^{-8}$                                       | $4.23 \times 10^{-10}$ | $1.26 \times 10^{-3}$ | 25.3                  | <b><math>7.07 \times 10^{-10}</math></b>               | $2.20 \times 10^{-10}$ | $8.08 \times 10^{-6}$  | 11.1                   |
| M8   | $K_{\text{NH}_3}/K_{\text{H}_2\text{O}}$ | $2.17 \times 10^{-7}$                                       | $1.58 \times 10^{-9}$  | $6.69 \times 10^{-5}$ | 7.82                  | $2.17 \times 10^{-7}$                                  | $1.58 \times 10^{-9}$  | $6.57 \times 10^{-5}$  | 7.82                   |
|      | $K_{\text{HNO}_3}$                       | <b>18.6</b>                                                 | 0.73                   | 20.8                  | 25.9                  | 37.0                                                   | 0.73                   | 39.2                   | 44.3                   |
|      | $K_{\text{HCl}}$                         | $6.50 \times 10^{-10}$                                      | $2.69 \times 10^{-10}$ | $3.20 \times 10^{-9}$ | 3.75                  | <b><math>2.50 \times 10^{-10}</math></b>               | $5.52 \times 10^{-11}$ | $7.74 \times 10^{-10}$ | 0.16                   |
| P13  | $K_{\text{NH}_3}/K_{\text{H}_2\text{O}}$ | $3.19 \times 10^{-9}$                                       | $4.25 \times 10^{-10}$ | $7.18 \times 10^{-8}$ | 2.05                  | <b><math>3.18 \times 10^{-9}</math></b>                | $4.26 \times 10^{-10}$ | $7.18 \times 10^{-8}$  | 2.05                   |
|      | $K_{\text{HNO}_3}$                       | $3.99 \times 10^{-8}$                                       | $2.38 \times 10^{-9}$  | $8.92 \times 10^{-2}$ | 23.1                  | <b><math>7.93 \times 10^{-10}</math></b>               | $2.93 \times 10^{-10}$ | $8.92 \times 10^{-2}$  | 41.5                   |
|      | $K_{\text{HCl}}$                         | $2.49 \times 10^{-9}$                                       | $2.81 \times 10^{-10}$ | $4.04 \times 10^{-8}$ | $7.45 \times 10^{-6}$ | <b><math>3.42 \times 10^{-10}</math></b>               | $7.82 \times 10^{-11}$ | $8.16 \times 10^{-10}$ | $2.12 \times 10^{-7}$  |
| L9   | $K_{\text{HSO}_4}$                       | $1.74 \times 10^{-2}$                                       | $2.93 \times 10^{-4}$  | 0.27                  | 73.0                  | <b><math>6.66 \times 10^{-15}</math></b>               | $8.88 \times 10^{-16}$ | $1.23 \times 10^{-12}$ | 12.1                   |
|      | $K_{\text{HNO}_3}$                       | 10.1                                                        | 4.95                   | 12.5                  | 26.7                  | <b><math>4.70 \times 10^{-10}</math></b>               | $2.30 \times 10^{-10}$ | $8.10 \times 10^{-10}$ | 21.0                   |
|      | $K_{\text{HCl}}$                         | 10.1                                                        | 4.95                   | 12.5                  | 26.7                  | <b><math>4.70 \times 10^{-10}</math></b>               | $2.30 \times 10^{-10}$ | $8.10 \times 10^{-10}$ | 21.0                   |
| K4   | $K_{\text{HSO}_4}$                       | 0.26                                                        | $2.28 \times 10^{-2}$  | 0.84                  | 11.9                  | <b><math>4.44 \times 10^{-16}</math></b>               | 0.00                   | $4.44 \times 10^{-16}$ | $3.52 \times 10^{-11}$ |
|      | $K_{\text{HNO}_3}$                       | 7.52                                                        | 3.86                   | 11.0                  | 29.2                  | <b><math>4.97 \times 10^{-10}</math></b>               | $2.43 \times 10^{-10}$ | $2.83 \times 10^{-9}$  | 29.2                   |
|      | $K_{\text{HCl}}$                         | 7.53                                                        | 3.86                   | 11.0                  | 29.2                  | <b><math>4.97 \times 10^{-10}</math></b>               | $2.43 \times 10^{-10}$ | $2.83 \times 10^{-9}$  | 29.2                   |

55

60



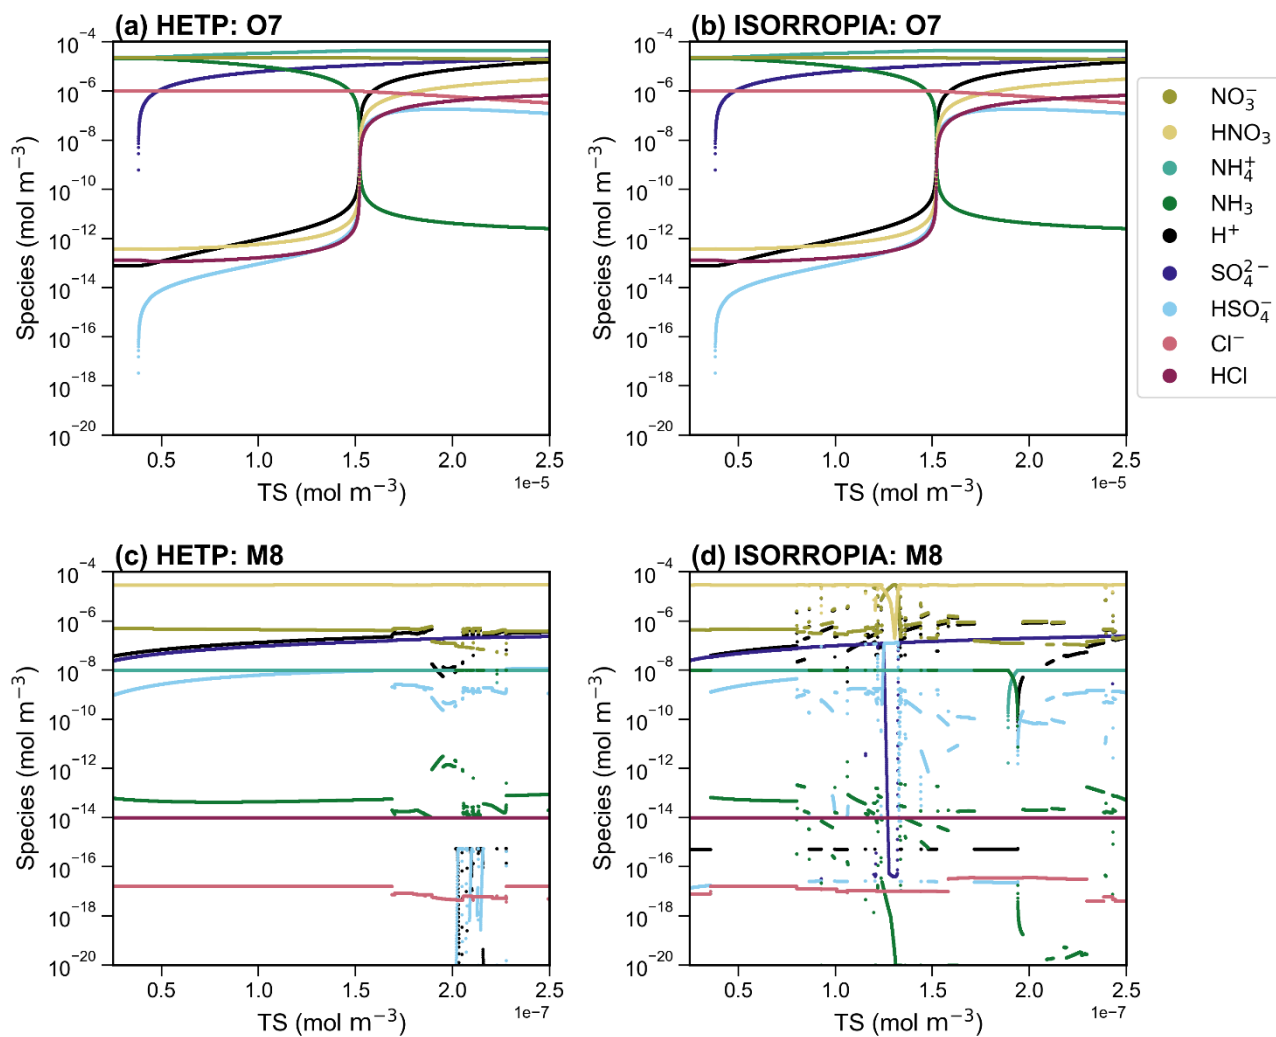

65 **Figure S1** - A side-by-side comparison of the output from HETP (left) and ISORROPIA (right), for chemical subspace CALCO7 (a-b) and CALCM8 (c-d). All input species are held constant, except the total available sulfate (**TS**) which is varied over 10,000 sets of initial conditions. The air temperature and relative humidity are 263 K and 65% respectively, for all test cases in the figure. The convergence criteria are consistent between both solvers (see text).
